# Supplementary material for: Comparison of Genomic Selection Models to Predict Flowering Time and Spike Grain Number in Two Hexaploid Wheat Doubled Haploid Populations
Source: Oxford University Press journal article supplement (doi:10.1534/g3.115.019745), 2015-07-24
Supplement: 019745_files1.xlsx [file 019745_files1.xlsx]

## Sheet: CH_1975snps
id	TYM	SGNC	SGNO	26463	4144	6058	76210	3240	3225	77581	7470	23779	11202	53793	5889	42099	59245	9029	68663	20633	22004	11044	41525	78238	42659	73652	79667.2	45602	35755	45604	53853	32900	36939	75970	64888	35066	26816	77089	35572	45812	74997	71997	69187	57676	35883	24291	44216	1803	79260
CH1	19.9845	11.8004	4.54823	2	2	NA	2	2	2	0	0	0	0	0	0	NA	0	2	2	2	2	2	2	2	2	2	2	2	2	NA	2	NA	2	2	2	2	2	2	2	2	2	2	NA	2	2	NA	2	2	2
CH2	-17.3772	-5.9517	-7.75242	0	0	0	0	0	0	0	0	0	0	0	0	0	NA	0	0	0	0	0	0	0	0	0	0	0	0	0	0	0	0	0	0	0	0	0	0	0	0	NA	0	0	0	NA	0	0	0
CH3	-6.2172	0.224241	6.87257	2	2	2	2	2	2	2	2	2	2	2	2	2	2	2	2	2	2	2	2	2	2	2	2	2	2	2	2	2	2	2	2	2	2	2	2	2	2	NA	2	2	2	2	NA	2	2
CH4	19.014	6.58427	1.3954	NA	2	2	2	2	2	2	2	2	2	2	2	2	2	2	2	2	2	2	2	2	2	2	2	2	2	2	2	2	2	2	2	2	2	2	2	2	2	2	2	2	2	2	2	2	NA
CH5	-18.3476	-4.38377	-4.64895	0	0	0	0	0	0	0	0	0	0	0	0	0	NA	0	0	0	0	0	0	0	0	0	NA	0	0	0	0	0	0	0	NA	0	0	0	0	0	0	NA	0	0	0	0	0	0	0
CH6	-13.9807	1.48582	-2.92576	2	2	2	2	2	2	2	2	2	2	2	2	2	2	0	0	0	0	0	0	0	0	0	0	0	0	0	0	0	0	0	0	0	0	0	0	0	0	NA	0	0	0	0	0	0	0
CH7	-15.9215	-4.27187	-5.37427	2	2	2	2	2	2	2	2	2	2	2	2	2	2	2	2	2	2	2	2	2	2	2	2	2	2	2	2	2	2	2	2	2	2	2	2	2	2	2	2	2	2	2	2	2	2
CH8	11.2506	-4.46492	-5.83642	0	0	0	0	0	0	0	0	2	2	2	2	2	2	2	2	2	2	2	2	2	2	2	NA	2	2	2	2	2	2	2	2	2	2	2	2	2	2	2	2	2	2	2	2	2	2
CH9	-1.85025	-5.0749	-8.21627	0	0	0	0	0	0	0	0	2	2	2	2	2	2	2	2	2	2	2	2	2	2	2	2	2	2	2	2	NA	2	2	2	2	2	2	2	2	2	2	2	2	2	2	2	2	2
CH10	3.48712	2.73183	5.09554	NA	0	0	0	0	0	0	0	0	0	0	0	0	0	0	0	0	0	0	0	NA	0	0	NA	2	2	2	2	NA	2	2	2	2	NA	NA	NA	NA	2	NA	NA	2	2	NA	NA	2	2
CH11	-12.525	-6.49089	-0.136581	2	2	2	2	2	2	2	2	2	2	2	2	2	2	2	2	2	2	2	2	2	2	2	NA	2	2	2	2	2	2	2	2	2	2	2	2	2	2	NA	NA	0	0	0	0	0	0
CH12	-13.9807	-3.20793	-0.786021	2	2	2	2	2	2	NA	NA	NA	2	2	0	0	0	0	0	0	0	0	0	NA	0	NA	0	0	0	0	0	0	0	NA	NA	0	NA	0	NA	0	0	NA	0	0	0	0	0	0	0
CH13	-4.76155	-2.84835	10.0427	0	0	0	0	0	0	0	0	0	0	0	0	0	0	0	0	0	0	0	0	0	0	0	0	0	0	0	0	NA	0	0	0	0	0	0	0	0	0	NA	0	0	0	0	0	0	0
CH14	4.45756	8.97865	6.33933	2	2	2	2	2	2	2	2	2	2	2	2	2	2	2	2	2	2	2	2	2	2	2	0	2	2	2	2	2	2	2	2	2	2	2	0	0	0	NA	0	0	0	0	0	0	0
CH16	19.4993	1.44263	0.0148956	2	2	2	2	2	2	2	2	2	2	2	2	2	2	2	2	2	2	2	2	2	2	2	NA	2	2	2	2	2	2	2	2	2	2	2	2	2	2	NA	NA	2	2	2	2	2	2
CH17	-1.85025	9.55707	3.66367	0	0	0	0	0	0	0	0	0	0	0	0	0	NA	0	0	0	0	0	0	0	0	0	NA	2	2	2	2	2	2	2	2	2	2	2	2	2	2	2	2	2	2	2	NA	2	2
CH18	-15.9215	-5.64965	-5.99405	NA	NA	2	2	2	NA	NA	2	2	2	2	2	NA	2	NA	2	2	NA	2	2	2	2	2	2	2	2	2	2	2	2	NA	2	2	2	NA	2	2	2	NA	2	2	2	2	NA	2	0
CH19	16.1027	1.20792	-3.03416	0	0	0	0	0	0	0	0	0	0	0	NA	NA	0	NA	0	0	0	0	0	0	0	0	NA	2	2	2	2	2	2	2	2	2	2	2	2	2	2	2	2	2	2	2	NA	2	NA
CH20	3.00191	10.6799	7.75932	2	2	2	2	2	2	2	2	2	2	2	2	2	2	2	2	2	2	2	2	2	2	2	2	2	2	2	2	2	2	2	2	2	2	2	2	2	2	2	2	2	2	2	2	2	2
CH21	14.6471	2.46264	3.64963	0	0	0	0	0	0	0	0	0	0	0	0	0	0	0	0	0	0	0	0	0	0	0	0	0	0	0	0	0	0	0	0	0	0	0	0	0	0	NA	NA	0	0	0	0	0	0
CH22	10.2801	-0.151517	2.44107	0	0	0	0	0	0	0	0	0	0	0	0	0	NA	0	0	0	0	0	0	0	0	0	0	0	0	0	0	0	0	0	0	0	0	0	0	0	0	NA	0	0	0	0	0	0	0
CH23	1.06104	4.49044	0.0230657	0	0	0	0	0	0	0	0	2	2	2	2	2	2	2	2	2	2	2	2	2	2	2	2	2	2	2	2	2	2	2	2	2	2	2	2	2	2	2	2	2	2	2	2	2	2
CH24	-17.3772	-4.12575	-5.31591	2	NA	NA	NA	NA	2	NA	NA	2	2	2	2	NA	NA	NA	0	NA	0	NA	NA	NA	0	0	NA	0	NA	0	NA	NA	0	0	0	0	NA	0	NA	NA	NA	NA	NA	0	0	NA	NA	0	0
CH25	7.36885	-2.48134	-6.81029	0	0	0	0	0	0	0	0	2	2	2	2	2	2	2	2	2	2	2	2	2	2	2	NA	2	2	2	2	2	2	2	2	2	2	2	2	2	2	NA	NA	2	2	2	2	2	2
CH26	2.03148	0.650315	6.81274	2	2	2	2	2	2	2	2	2	2	2	2	2	2	2	2	2	2	2	2	2	2	2	NA	2	2	2	2	2	2	2	2	2	2	2	2	2	2	2	2	2	2	2	NA	2	2
CH27	-7.67284	-4.19839	-5.16877	2	2	2	2	2	2	2	2	2	2	2	2	2	2	2	2	2	2	2	2	2	2	2	2	2	2	2	2	2	2	2	2	2	2	2	2	2	2	2	2	2	2	2	2	2	2
CH28	-1.85025	3.34715	-5.16157	0	0	0	0	0	0	0	0	0	0	0	0	0	0	0	0	0	0	0	0	0	0	0	0	0	0	0	0	0	0	0	0	0	0	0	0	0	0	0	NA	0	0	0	0	0	0
CH29	-3.3059	3.08468	14.7744	0	0	0	0	0	0	0	0	0	0	0	0	0	0	0	0	0	0	0	0	0	0	0	0	0	0	0	0	0	0	0	0	0	0	0	0	0	0	NA	NA	0	2	2	0	0	0
CH30	-2.82068	0.0711109	-1.97106	2	2	2	2	2	NA	2	2	2	2	2	2	2	2	2	2	2	2	2	2	2	2	2	NA	2	2	2	2	2	2	2	2	2	2	2	2	2	2	2	2	2	2	2	2	2	2
CH31	11.7358	3.44426	1.69917	2	2	2	2	2	2	2	2	0	0	0	0	0	0	0	0	0	0	0	0	0	0	0	NA	0	0	0	0	0	0	0	0	0	0	0	0	0	0	NA	0	0	0	0	0	0	0
CH32	-7.67284	5.00821	9.37722	0	NA	0	0	0	0	0	0	0	0	0	0	0	0	0	0	0	0	0	0	0	0	0	NA	0	0	0	0	0	0	0	0	0	0	0	0	0	0	NA	0	0	0	0	0	0	0
CH33	15.6175	4.79522	-1.6939	2	2	2	2	2	2	2	2	2	2	2	2	NA	0	0	0	0	0	0	0	0	0	0	NA	0	0	0	0	0	0	0	0	0	0	0	0	0	0	NA	0	0	0	0	0	0	0
CH34	26.7775	6.62391	9.184	0	0	0	2	0	0	0	0	0	0	0	0	0	0	2	2	2	2	2	0	2	2	2	2	2	2	2	2	2	2	2	2	2	2	2	2	2	2	2	2	2	2	2	2	2	NA
CH35	-15.4363	-6.39009	-11.6315	2	2	2	2	2	2	2	2	2	2	2	2	2	2	2	2	2	2	2	2	2	2	2	2	2	2	2	2	2	2	2	2	2	2	2	2	2	2	2	2	2	2	2	2	2	2
CH36	15.6175	0.692385	-8.4044	2	2	2	2	2	2	2	2	2	2	2	2	2	2	2	2	2	2	2	2	2	2	2	NA	2	2	2	2	2	2	2	2	2	2	2	2	NA	NA	NA	2	NA	NA	NA	NA	NA	NA
CH37	7.85407	-1.55567	-0.291801	0	0	0	0	0	0	0	0	2	2	2	2	NA	2	2	2	2	2	2	2	2	2	2	2	2	2	2	2	2	2	2	2	2	2	2	2	2	2	NA	2	2	2	2	NA	2	2
CH38	1.54626	0.293579	-1.17014	0	0	0	0	0	0	0	0	0	0	0	0	0	0	0	0	0	0	0	0	0	0	0	0	0	0	0	0	0	0	0	0	0	0	0	0	0	0	NA	0	0	0	0	0	0	0
CH39	17.5584	11.536	5.16885	0	0	0	0	0	0	0	0	0	2	2	2	NA	2	2	2	2	2	2	2	2	2	2	2	2	2	2	2	2	2	2	2	2	2	2	2	2	2	2	2	2	2	2	2	2	2
CH40	11.2506	2.18574	6.96503	NA	2	2	2	2	0	0	0	0	0	0	0	0	0	0	0	0	0	0	0	0	0	0	NA	0	0	0	0	0	0	0	0	0	0	0	0	0	0	NA	0	0	0	0	0	0	0
CH41	-2.82068	-0.870672	-6.90534	0	0	0	0	0	0	0	0	0	0	0	0	0	0	0	0	0	0	0	0	0	0	0	NA	0	0	0	0	0	0	0	0	0	0	0	0	0	0	0	0	0	0	0	0	0	0
CH42	3.48712	-3.20335	3.93543	NA	0	0	0	0	0	0	0	2	2	2	2	NA	2	2	2	2	2	2	2	2	2	2	2	2	2	2	2	2	2	2	2	2	2	2	2	2	2	NA	2	2	2	2	2	2	2
CH43	3.48712	-0.331306	-0.222603	2	2	2	2	2	2	2	2	0	0	0	0	0	0	0	0	0	0	0	0	0	0	0	0	0	0	0	0	0	0	0	0	0	0	0	0	0	0	NA	NA	0	0	0	0	0	0
CH44	-4.76155	3.44426	9.19868	NA	0	0	0	0	0	0	0	0	2	2	2	2	2	2	2	2	2	2	2	2	2	2	NA	2	2	2	2	2	2	2	2	2	2	2	2	2	0	NA	0	0	0	0	0	0	0
CH45	-0.394603	-2.44945	0.281868	0	0	0	0	0	0	0	0	0	0	0	0	0	0	0	0	0	0	0	0	0	0	0	0	0	0	0	0	0	0	0	0	0	0	0	0	0	0	0	0	0	0	0	0	0	0
CH46	-13.9807	-3.64132	-3.67972	2	2	2	2	2	2	2	2	0	0	0	0	0	0	0	0	0	0	0	0	0	0	0	NA	0	0	0	0	0	0	0	0	0	0	0	0	0	0	0	0	0	0	0	0	0	0
CH47	-17.3772	-2.10693	-2.25437	0	0	0	0	0	0	0	0	0	0	0	0	0	0	0	0	0	0	0	0	0	0	0	0	0	0	0	0	NA	0	0	0	0	0	0	0	0	0	0	0	0	0	0	0	0	0
CH48	19.014	-3.20793	0.156552	0	0	0	0	0	0	0	0	0	0	0	0	0	0	0	0	0	0	0	0	0	0	0	0	0	0	0	0	0	0	0	0	0	0	0	0	0	0	NA	0	0	0	0	0	0	0
CH49	-1.85025	4.03327	-4.80827	2	2	2	2	2	2	2	2	2	2	2	2	2	2	2	2	2	2	2	2	2	2	2	2	2	2	2	2	2	2	2	2	2	2	2	2	2	2	2	2	2	2	2	NA	2	2
CH51	-3.79112	-0.163593	-5.02996	2	2	2	2	2	2	2	2	2	2	2	2	2	2	2	2	2	2	2	2	2	2	2	NA	2	2	2	2	2	2	2	2	2	2	2	2	2	2	2	2	2	2	2	2	2	2
CH52	16.588	2.41149	-8.6617	2	2	2	2	2	2	2	2	2	2	2	2	2	2	2	2	2	2	2	2	2	2	2	2	2	2	2	2	2	NA	2	2	2	2	2	2	2	2	2	NA	2	2	NA	2	2	2
CH53	-7.67284	0.843445	9.91969	0	0	0	0	0	0	0	0	0	0	0	0	0	0	0	0	0	0	0	0	0	0	0	0	0	0	0	0	0	0	0	0	0	0	0	0	0	0	0	0	0	0	0	0	0	0
CH54	20.4697	4.58812	8.49908	2	2	2	2	2	2	2	2	2	2	2	2	2	2	2	2	2	2	2	2	2	2	2	2	2	2	2	2	2	2	2	2	2	2	2	2	2	2	NA	2	2	2	2	NA	2	2
CH55	3.97234	-3.74729	-4.75807	2	2	2	2	2	2	2	2	0	0	0	0	0	0	0	0	0	0	0	0	0	0	0	0	0	0	0	0	NA	0	0	0	0	0	0	0	0	0	NA	0	0	0	0	0	0	0
CH56	2.03148	-1.34854	-5.97872	2	2	2	2	2	2	2	2	0	0	0	0	0	0	0	0	0	0	0	0	0	0	0	0	0	0	0	0	0	0	0	0	0	0	0	0	0	0	NA	0	0	0	0	0	0	0
CH57	3.48712	-10.2214	-1.98909	2	2	2	2	2	2	2	2	0	0	0	0	0	0	0	0	0	0	0	0	0	0	0	0	0	0	0	0	0	0	0	0	0	0	0	0	0	0	NA	NA	0	0	0	0	0	0
CH58	-4.76155	5.07529	14.0429	2	2	2	2	2	2	2	2	2	2	2	2	2	2	2	2	2	2	2	2	2	2	2	NA	2	2	2	2	2	2	0	0	0	0	0	0	0	0	NA	0	0	0	0	0	0	0
CH59	8.33928	-1.38272	6.30681	0	0	0	0	0	0	0	0	0	0	0	0	NA	0	0	0	0	0	0	0	0	0	0	0	0	0	0	0	0	0	0	0	0	0	0	0	0	0	NA	0	0	0	0	0	0	0
CH60	-15.9215	-2.30898	-1.21493	0	0	0	0	0	0	0	0	0	0	0	0	0	0	0	0	0	0	0	0	0	0	0	NA	0	0	0	0	0	0	0	0	0	0	0	0	0	0	NA	0	0	0	NA	0	0	0
CH61	8.8245	-1.14757	-4.53158	0	0	0	0	0	0	0	0	0	2	2	2	2	2	2	2	2	2	2	2	2	2	2	NA	2	2	2	2	2	2	2	2	2	2	2	2	2	0	0	NA	0	0	0	0	0	0
CH62	23.8662	6.42427	-3.24184	2	2	2	2	2	2	NA	2	2	2	2	2	2	2	2	2	2	2	2	2	2	2	2	NA	2	2	2	2	2	2	2	2	2	2	2	2	2	2	2	2	2	2	2	2	2	2
CH63	-2.82068	3.189	-4.91592	2	2	2	2	2	2	2	2	2	2	2	2	2	2	2	2	2	2	2	2	2	2	2	NA	2	2	2	2	NA	2	2	2	2	2	NA	NA	2	2	2	NA	2	2	2	NA	2	2
CH64	-16.4067	-3.54052	-8.91741	NA	0	0	0	0	0	0	0	0	0	0	0	0	0	0	0	0	0	0	0	0	0	0	0	0	0	0	0	0	0	0	0	0	0	0	0	0	0	NA	0	0	0	0	0	0	0
CH65	5.42799	2.4723	-5.45804	2	2	2	2	2	2	2	2	0	0	0	0	0	0	0	0	0	0	0	0	0	0	0	NA	0	0	0	0	0	0	0	0	0	0	0	0	0	0	NA	0	0	0	0	0	0	0
CH66	14.1619	3.5886	3.59356	0	0	0	0	0	0	0	0	0	0	0	0	0	0	0	0	0	NA	0	0	0	0	0	NA	0	0	0	0	0	0	0	0	0	0	0	0	0	0	NA	0	0	0	0	0	0	0
CH67	-10.5841	-4.02419	6.56552	NA	2	2	2	2	2	2	2	2	2	2	2	NA	2	2	2	2	2	2	0	0	0	0	0	0	0	0	0	0	0	0	0	0	0	0	0	0	0	NA	NA	0	0	0	NA	0	0
CH68	0.575829	-1.78693	-0.706786	2	2	2	2	2	2	2	2	0	0	0	0	0	0	0	0	0	0	0	0	0	0	0	0	0	0	0	0	0	0	0	0	0	0	0	0	0	0	NA	NA	0	0	0	0	0	0
CH69	13.6767	4.84356	7.88246	2	2	2	2	2	2	2	2	2	2	2	2	NA	2	2	2	2	2	2	2	2	2	2	2	2	2	2	2	2	2	2	2	2	2	2	2	0	0	0	0	0	0	0	0	0	0
CH70	-2.82068	-7.04769	-2.32797	0	0	0	0	0	0	0	0	2	2	2	2	NA	2	2	2	2	2	2	2	2	2	2	2	2	2	2	2	NA	2	2	2	2	2	2	2	2	2	2	2	2	2	2	NA	2	2
CH71	-12.525	-7.56066	-5.46726	2	2	2	2	2	2	2	2	2	2	2	2	2	2	2	2	2	2	2	2	2	2	2	NA	2	2	2	2	2	2	2	2	2	2	2	2	2	2	2	2	2	2	2	2	2	2
CH72	-3.79112	-4.3935	-0.889534	0	0	0	0	0	0	0	0	0	0	0	0	0	0	0	0	0	0	0	0	0	0	0	NA	0	0	0	0	0	0	2	2	2	2	2	2	2	2	2	2	2	2	2	2	2	2
CH73	13.1914	3.88651	4.22153	0	0	0	0	0	0	0	0	2	2	2	2	2	2	2	2	2	2	2	2	2	2	2	2	2	2	2	2	2	2	2	2	2	2	2	2	2	2	2	2	2	2	2	2	2	2
CH74	-16.4067	-7.26039	1.35793	2	2	2	2	2	2	2	2	2	2	2	2	2	2	2	2	2	2	2	2	2	2	2	2	2	2	2	2	2	2	2	2	2	2	2	2	2	2	2	2	2	2	2	NA	2	2
CH75	-2.82068	-6.39009	-4.29592	NA	0	0	0	0	0	0	0	0	0	0	0	0	0	0	0	0	0	0	0	0	0	0	NA	0	0	0	0	0	0	0	0	0	0	0	0	0	0	NA	0	0	0	0	0	0	0
CH76	13.6767	4.8526	5.4548	NA	NA	0	0	0	0	0	0	2	2	2	2	2	2	2	2	2	2	2	2	2	2	2	NA	2	2	2	2	2	2	2	2	2	2	2	2	2	2	NA	2	2	2	2	2	2	2
CH77	-16.8919	-2.66372	-4.28649	2	2	2	2	2	2	2	2	2	2	2	2	2	2	2	2	2	2	2	2	2	2	2	NA	2	2	2	2	2	2	2	2	2	2	2	2	2	2	2	2	2	2	2	2	2	2
CH78	19.9845	-5.8333	-0.607876	0	0	0	0	0	0	0	0	2	2	2	2	2	2	2	2	2	2	2	2	2	2	2	2	2	2	2	2	2	2	2	2	2	2	2	2	2	2	2	2	2	2	2	2	2	2
CH79	15.1323	8.46347	10.023	2	2	2	2	2	2	2	2	0	0	0	0	0	0	0	0	0	0	0	0	0	0	0	0	0	0	0	0	NA	0	0	0	0	0	0	0	0	0	0	0	0	0	0	0	0	0
CH80	-17.3772	-6.8037	-3.70638	2	2	2	2	2	2	0	0	0	0	0	0	NA	0	0	0	0	0	0	0	0	0	0	NA	0	0	0	0	NA	0	0	0	0	0	0	0	0	0	NA	NA	0	0	NA	NA	0	0
CH81	-16.8919	-9.23967	-6.89891	2	2	2	2	2	2	0	0	0	0	0	0	0	0	0	0	0	0	0	0	0	0	0	NA	0	0	0	0	NA	0	0	0	0	0	0	0	0	0	0	0	0	0	0	0	0	0
CH82	-7.18763	-0.823051	1.1978	0	0	0	0	0	0	0	0	0	0	0	0	0	0	0	0	0	0	0	0	0	0	0	NA	0	0	0	0	0	0	0	0	0	0	0	0	0	0	NA	0	0	0	0	0	0	0
CH83	13.6767	-8.06784	-0.291801	0	0	0	0	0	0	0	0	0	0	0	0	0	0	0	0	0	0	0	0	0	2	2	2	2	2	2	2	2	2	2	2	2	2	2	2	2	2	2	2	2	2	2	2	2	2
CH84	3.97234	3.17028	1.77614	0	0	0	0	0	0	0	0	2	2	2	2	2	2	2	2	2	2	2	2	2	2	2	NA	2	2	2	2	2	2	2	2	2	2	2	2	2	2	2	2	2	2	2	2	2	2
CH85	1.54626	0.896052	-0.804225	2	2	2	2	2	2	0	0	0	0	0	0	0	0	0	0	0	0	0	0	0	0	0	0	0	0	0	0	0	0	0	0	0	0	0	0	0	0	0	0	0	0	0	0	0	0
CH86	-17.3772	-3.97891	-6.61609	2	2	2	2	2	2	2	2	2	2	2	2	NA	2	2	2	2	2	2	2	2	2	2	NA	2	2	2	2	2	2	2	2	2	2	2	2	2	2	2	2	2	2	2	2	2	2
CH87	5.42799	1.93944	-6.60666	2	2	2	2	2	2	2	2	2	2	2	2	2	2	2	2	2	2	2	2	2	2	2	2	2	2	2	2	2	2	2	2	2	2	2	2	2	2	2	NA	2	2	2	NA	2	2
CH88	3.00191	-2.29706	-0.403608	0	0	0	0	0	0	0	0	2	2	2	2	2	2	2	2	2	2	2	2	2	2	2	2	2	2	2	2	2	2	2	2	2	2	2	2	2	2	2	2	2	2	2	NA	2	2
CH89	-12.525	-2.22533	-3.70638	0	0	NA	0	0	0	0	2	0	NA	0	0	0	0	2	NA	2	NA	2	2	2	0	2	NA	0	2	2	2	2	2	2	2	0	0	NA	0	2	2	2	2	2	2	2	0	0	0
CH90	-2.82068	4.33805	7.79269	2	2	2	2	2	2	2	2	2	2	2	2	2	0	0	0	0	0	0	0	0	0	0	0	0	0	0	0	0	0	0	0	0	0	0	0	0	0	NA	NA	0	0	0	0	0	0
CH91	1.54626	-0.925546	-1.83757	2	2	2	2	2	2	2	2	2	2	2	2	2	2	2	2	2	2	2	2	2	2	2	2	2	2	2	2	2	2	2	2	2	2	2	2	2	2	2	2	2	2	2	2	2	2
CH93	-1.36504	0.367097	-0.208187	0	0	0	0	0	0	0	0	0	0	0	0	0	0	0	0	0	0	0	0	0	0	0	NA	0	0	0	0	0	0	0	0	0	0	0	0	0	0	NA	0	0	0	0	0	0	0
CH94	-15.9215	-6.71009	1.842	2	2	2	2	2	2	2	2	2	2	2	2	2	2	0	0	0	0	0	0	0	0	0	0	0	0	0	0	0	0	0	0	0	0	0	0	0	0	NA	0	0	0	0	0	0	0
CH95	8.8245	11.7972	5.70718	2	NA	2	2	2	2	2	2	2	2	2	2	2	2	2	2	2	2	2	2	2	2	2	NA	2	2	2	2	2	2	2	2	2	2	2	2	2	2	2	2	2	2	2	2	2	2
CH96	-1.36504	3.62405	-0.11859	0	0	0	2	0	0	0	0	2	2	2	2	2	2	2	2	2	2	2	2	2	0	0	NA	0	0	0	0	0	0	0	0	0	0	0	0	0	0	NA	0	0	0	0	0	0	0
CH97	7.36885	2.57944	0.188452	2	NA	2	2	2	2	2	2	2	2	2	2	2	2	2	2	2	2	2	2	2	2	2	2	2	2	2	2	2	2	2	2	2	2	2	2	2	2	2	2	2	2	2	2	2	2
CH98	-16.4067	-6.31626	-9.83228	2	2	2	2	2	2	2	2	2	2	2	2	2	2	2	2	2	2	2	2	2	2	2	2	2	2	2	2	2	2	2	2	2	2	2	2	2	2	2	2	2	2	2	2	2	2
CH99	-7.67284	2.4482	6.83903	NA	2	2	2	2	2	2	NA	2	NA	2	2	NA	2	2	NA	2	2	2	2	2	2	2	2	2	NA	NA	NA	NA	0	0	0	0	0	NA	0	0	0	NA	NA	0	0	0	0	0	NA
CH100	-8.15806	3.47382	7.08973	2	2	NA	2	2	2	0	0	0	0	0	0	0	0	0	0	0	0	0	0	0	0	0	NA	0	0	0	0	0	0	0	0	0	0	0	0	0	NA	NA	NA	0	0	0	0	0	0
CH101	7.36885	0.0282719	1.90439	2	2	2	2	2	2	2	2	2	2	2	2	2	2	2	0	0	0	0	0	0	0	0	0	0	0	0	0	0	0	0	0	0	0	0	0	0	0	NA	NA	0	0	0	0	0	0
CH102	3.48712	-0.294096	-8.53784	NA	2	2	2	2	2	2	2	0	0	0	0	0	NA	0	0	0	0	0	0	0	0	0	NA	0	0	0	0	2	2	2	2	2	2	2	2	2	2	2	2	2	2	2	2	2	2
CH103	1.06104	5.32074	4.84854	0	0	0	0	0	0	0	0	0	0	0	0	0	0	0	0	0	0	0	0	0	0	0	0	0	0	0	0	0	0	0	0	0	0	0	0	0	0	2	2	2	2	2	2	2	2
CH104	-18.3476	-2.2238	-1.43584	0	0	0	0	0	0	0	0	0	0	0	0	0	0	0	0	0	0	0	0	0	0	0	NA	0	0	0	0	NA	0	0	0	0	0	0	0	0	0	NA	NA	0	0	0	0	0	0
CH105	3.00191	-7.76151	0.895276	0	0	0	0	0	0	0	0	0	0	0	0	0	NA	0	0	0	2	NA	NA	2	2	2	NA	2	2	2	2	2	2	2	2	2	2	2	2	2	2	2	2	2	2	2	2	2	2
CH106	-3.79112	4.90741	3.21856	2	2	2	2	2	2	2	2	2	2	2	2	2	2	2	2	2	2	2	2	2	2	2	NA	2	2	2	2	2	2	2	2	2	2	2	2	2	2	2	2	2	2	2	NA	2	2
CH107	-14.4659	1.74348	-0.707432	0	0	0	0	0	0	0	0	0	0	0	0	0	2	2	2	2	2	2	2	2	2	2	2	2	2	2	2	2	2	2	2	2	2	2	2	2	2	2	2	2	2	2	2	2	2
CH108	0.0906126	0.387849	-2.39897	0	0	0	0	0	0	0	0	0	0	0	0	0	2	2	2	2	2	2	2	2	2	2	NA	2	2	2	2	2	2	2	2	2	2	2	2	2	2	2	2	2	2	2	2	2	2
CH109	-1.36504	9.36694	2.25048	2	2	2	2	2	2	2	2	2	2	2	2	2	2	2	0	0	0	0	0	0	0	0	0	0	0	0	0	0	0	0	0	0	0	0	0	0	0	NA	0	0	0	0	0	0	0
CH110	-4.76155	-1.3816	1.3661	0	NA	0	NA	0	0	0	0	0	NA	0	0	NA	NA	NA	0	NA	0	NA	NA	0	0	0	NA	0	NA	0	0	0	0	0	0	0	0	0	0	0	0	NA	NA	0	0	0	0	0	0
CH111	-0.879819	0.44597	1.08724	NA	2	2	2	2	2	2	2	0	0	0	0	0	0	0	0	2	2	2	2	2	2	2	NA	2	2	2	2	2	2	2	2	2	2	2	2	2	2	2	2	2	2	2	NA	2	2
CH112	-15.9215	-6.08455	-0.290631	NA	0	0	NA	NA	0	0	0	0	0	0	0	NA	0	0	0	NA	0	0	0	0	0	0	0	0	0	0	0	0	0	0	0	0	0	0	0	0	0	NA	0	0	0	0	NA	0	NA
CH113	-0.394603	2.18574	0.281868	0	0	0	0	0	0	0	0	0	0	0	0	0	2	2	2	2	2	2	2	2	2	2	NA	2	2	2	2	2	2	2	2	2	2	2	2	2	2	2	2	2	2	2	2	2	2
CH114	16.1027	-3.54052	0.129632	2	2	2	2	2	2	2	2	2	2	2	2	2	2	2	2	2	2	0	0	0	0	0	0	0	0	0	0	0	0	0	0	0	0	0	0	0	0	NA	NA	0	0	0	0	0	0
CH115	11.2506	-1.9494	-6.65941	2	2	2	2	NA	2	2	2	0	0	0	0	NA	0	0	0	0	0	0	0	0	0	0	NA	0	0	0	0	0	0	0	NA	0	0	0	0	0	0	NA	0	0	0	0	0	0	0
CH116	6.88364	-1.53511	-2.72794	0	0	0	0	0	0	0	0	2	2	2	2	NA	2	2	2	2	2	2	2	2	2	2	NA	2	2	2	2	2	2	2	2	2	2	2	2	2	2	NA	NA	2	2	2	NA	2	2
CH117	1.54626	0.403118	-2.10686	0	0	0	0	0	0	2	2	2	2	2	2	2	2	2	2	2	2	2	2	2	2	2	2	2	2	2	2	2	2	2	2	2	2	2	2	2	2	2	2	2	2	2	2	2	2
CH118	8.8245	4.17342	-1.72042	2	2	2	2	2	2	2	2	2	2	2	2	2	2	2	2	2	2	2	2	2	2	2	2	2	2	2	2	2	2	2	2	2	2	2	2	2	2	2	2	2	2	2	2	2	2
CH119	2.03148	6.30689	8.26376	2	2	2	2	2	2	2	2	2	2	2	2	2	2	2	2	2	2	2	2	2	2	2	NA	2	2	2	2	2	2	2	0	0	2	2	0	0	0	0	NA	0	0	0	0	0	0
CH120	2.03148	-0.234946	0.953781	0	0	0	0	0	0	0	0	0	0	0	0	0	0	0	0	0	0	0	0	0	0	0	NA	0	0	0	0	0	0	0	0	0	0	0	0	0	0	NA	0	0	0	0	0	0	0
CH121	-13.4954	-1.78693	-1.9874	2	2	2	2	2	2	2	2	2	2	2	2	2	2	2	2	0	0	0	0	0	0	0	0	0	0	0	0	NA	0	0	0	0	0	0	0	0	0	NA	0	0	0	0	0	0	0
CH122	-16.8919	-8.54508	-10.3008	2	0	0	0	0	0	0	0	0	0	0	0	NA	NA	0	NA	NA	NA	NA	NA	NA	0	0	0	0	0	0	NA	0	0	2	2	NA	2	NA	2	2	2	2	NA	2	2	NA	0	2	2
CH123	-17.3772	-13.3393	-12.0919	2	0	2	2	2	2	2	NA	NA	0	0	0	0	0	NA	0	NA	NA	NA	NA	NA	0	0	NA	0	0	NA	NA	2	0	0	0	NA	0	NA	0	NA	NA	0	0	NA	0	2	2	NA	NA
CH124	8.8245	-0.233285	-4.10167	2	2	2	2	2	2	2	2	0	0	0	0	NA	0	0	0	0	0	0	0	0	0	0	NA	0	0	0	0	0	0	0	0	0	0	0	0	0	0	0	0	0	0	0	0	0	0
CH125	10.2801	-4.99388	-1.99043	2	2	2	2	2	2	2	2	2	2	2	2	2	2	2	2	2	2	2	2	2	2	2	NA	2	2	2	2	2	2	2	2	2	2	2	2	2	2	2	NA	2	2	2	2	2	2
CH126	7.36885	3.44426	5.43016	2	2	2	2	2	2	2	2	2	2	2	2	2	2	2	2	2	2	2	2	2	2	2	NA	2	2	2	2	2	2	2	2	NA	2	2	2	2	2	2	2	2	2	2	NA	2	2
CH127	1.54626	1.28679	4.23216	0	0	0	0	0	0	0	0	0	0	0	0	0	0	0	0	0	0	0	2	2	2	2	2	2	2	2	2	2	2	2	2	2	2	NA	2	2	2	NA	2	2	2	2	NA	2	2
CH128	19.014	7.15116	5.90123	0	0	0	0	0	0	0	0	0	0	0	0	0	0	0	0	0	0	0	0	0	0	0	NA	0	0	0	0	0	0	0	0	0	0	0	0	0	0	0	0	0	0	0	0	0	0
CH129	8.8245	-1.21581	6.04878	0	0	0	0	0	0	0	0	0	0	0	0	0	NA	0	0	0	0	0	0	0	0	0	NA	0	0	0	0	0	0	0	0	0	0	0	0	0	0	0	0	0	0	0	NA	0	0
CH130	15.6175	8.06876	4.01697	2	2	2	2	2	2	2	2	0	0	0	0	0	0	0	0	0	0	0	0	0	0	0	0	0	0	0	0	0	0	0	0	0	0	0	0	0	0	0	0	0	0	0	0	0	0
CH131	-13.9807	-7.70264	-11.6903	2	2	2	2	2	2	2	2	2	2	2	2	2	2	2	2	2	2	2	2	2	2	2	NA	2	2	2	2	2	2	2	2	2	2	2	2	2	2	2	NA	2	2	2	2	2	2
CH132	-7.18763	1.96342	6.62804	0	0	0	0	0	0	0	0	0	0	0	2	2	2	2	2	2	2	2	2	2	2	2	2	2	2	2	2	2	2	2	2	2	2	2	2	2	2	2	2	2	2	2	2	2	2
CH133	-12.525	0.405049	9.35892	0	0	0	0	0	0	0	0	0	0	0	0	0	0	0	0	0	0	0	0	0	0	0	NA	0	0	0	0	NA	0	0	0	0	0	0	0	0	0	NA	0	0	0	0	0	0	0
CH134	-8.64328	5.24931	8.02102	0	0	0	0	0	0	0	0	0	0	0	0	0	0	0	0	0	0	0	0	0	0	0	0	0	0	0	0	NA	0	0	0	0	0	0	0	0	0	NA	0	0	0	0	0	0	0
CH135	-12.525	-4.41731	-0.589302	0	0	0	0	0	0	0	0	2	2	2	2	NA	2	2	2	2	2	2	2	2	2	2	2	2	2	2	2	2	2	2	2	2	2	2	2	2	2	2	2	2	2	2	2	2	2
CH137	3.00191	-0.608206	2.55287	2	2	2	2	2	2	2	0	2	2	2	2	2	2	2	2	2	2	2	2	2	2	2	NA	2	2	2	2	2	2	2	2	2	2	2	2	2	2	2	2	2	2	2	2	2	2
CH138	-14.9511	-1.05046	-4.7906	0	0	0	0	0	0	0	0	0	0	0	0	0	0	0	0	0	0	0	0	0	0	0	0	0	0	0	0	0	0	0	0	0	0	0	0	0	0	0	0	0	0	0	0	0	0
CH139	18.5288	8.22999	2.58949	0	NA	0	0	0	0	0	0	0	0	0	0	0	0	0	0	0	NA	0	0	0	0	0	NA	0	0	0	0	NA	0	0	0	0	0	0	0	0	0	NA	0	0	0	0	0	0	0
CH140	-2.82068	4.97968	5.27929	NA	NA	0	NA	0	0	0	0	0	NA	0	0	NA	0	NA	NA	NA	NA	0	0	0	2	2	NA	2	NA	NA	2	NA	2	2	2	2	2	NA	2	NA	NA	NA	NA	2	2	2	NA	NA	2
CH141	13.6767	-0.76224	3.44733	2	2	2	2	2	2	NA	2	2	2	2	2	2	2	2	2	2	2	2	2	2	2	2	2	2	2	2	2	2	2	2	2	2	2	2	2	2	2	2	NA	2	2	2	2	2	2
CH142	1.06104	-7.34307	-10.5142	2	2	2	2	NA	2	2	2	2	2	2	2	NA	2	2	2	2	2	2	2	2	2	2	2	2	2	2	2	2	2	2	2	2	2	2	2	2	2	2	NA	2	2	2	2	2	NA
CH143	-8.15806	-0.06884	0.403052	0	0	0	0	0	0	0	0	2	2	2	2	2	2	2	2	2	2	2	2	2	2	2	2	2	2	2	2	2	2	2	2	2	2	2	2	2	2	2	2	2	2	2	2	2	2
CH144	-8.15806	-0.011202	2.75251	2	2	2	2	2	2	2	2	2	2	2	2	2	2	2	0	0	0	0	0	0	0	0	NA	0	0	0	0	0	0	0	0	0	NA	0	0	0	0	NA	0	0	0	0	0	0	0
CH145	-16.4067	-2.54533	4.58468	0	0	0	0	0	0	2	2	2	2	2	2	2	2	2	2	2	2	2	2	2	2	2	2	2	2	2	2	2	2	2	2	2	2	2	2	2	2	2	NA	2	2	2	NA	2	2
CH146	-8.64328	2.90489	6.97148	0	0	0	0	0	0	0	0	0	0	0	0	NA	NA	0	0	0	0	0	0	0	0	0	NA	0	0	0	0	NA	0	0	0	0	0	0	0	0	0	NA	0	0	0	0	0	0	0
CH147	-15.9215	-7.39603	-2.75542	0	0	0	0	0	0	0	0	0	0	0	0	0	0	0	0	0	0	0	0	0	0	0	NA	0	0	0	0	0	0	0	0	0	0	0	0	0	0	NA	0	0	0	0	0	0	0
CH148	-17.3772	-7.02117	-6.6262	2	2	2	2	2	2	2	2	2	2	2	2	0	NA	0	0	0	0	0	0	0	0	0	0	0	0	0	0	0	0	0	0	0	0	0	0	0	0	NA	0	0	0	0	0	0	0
CH149	10.2801	-1.66853	5.38465	0	0	0	0	0	0	NA	2	2	2	2	2	2	2	2	2	2	2	2	2	2	2	2	2	2	2	2	2	2	2	NA	2	2	2	2	2	2	2	NA	NA	2	2	2	NA	2	2
CH150	8.33928	4.8653	-1.21493	0	0	0	0	0	0	0	0	2	2	2	2	2	2	2	2	2	2	2	2	2	2	2	NA	2	2	2	2	2	2	2	2	2	2	2	2	2	2	2	2	2	2	2	NA	2	2
CH151	-14.9511	-0.269552	-7.12639	0	0	0	0	0	0	0	0	2	2	2	2	NA	2	2	2	2	NA	2	2	2	2	2	2	2	2	2	2	NA	2	2	2	2	2	2	2	2	2	NA	2	2	2	2	NA	2	2
CH152	13.1914	-2.22698	-6.8175	0	NA	0	NA	0	0	0	NA	2	2	2	2	2	2	2	2	2	2	NA	NA	NA	NA	2	NA	NA	NA	2	2	2	2	2	2	NA	2	2	2	2	2	2	NA	NA	2	NA	NA	2	2
CH153	-17.3772	-5.41495	-0.811433	NA	2	2	2	2	2	2	2	2	2	2	2	0	0	0	0	0	0	0	0	0	0	0	0	0	0	0	0	0	0	0	0	0	0	0	0	0	0	NA	0	0	0	0	0	0	0
CH154	6.39842	5.4466	9.81615	0	0	0	2	0	0	0	0	0	0	NA	0	0	0	0	0	0	0	0	0	0	0	0	NA	0	0	0	0	0	NA	0	0	0	0	NA	0	0	0	NA	NA	0	0	NA	0	0	0
CH155	-14.9511	0.747427	-1.54611	2	2	2	2	2	2	2	2	2	2	2	2	2	2	2	2	2	2	2	2	2	2	2	2	2	2	2	2	2	2	2	2	2	2	2	2	2	2	NA	2	2	2	2	2	2	2
CH156	3.00191	2.81685	-9.37956	NA	2	2	2	2	2	0	0	0	0	0	0	0	0	0	0	0	0	NA	0	0	0	0	NA	0	0	0	0	0	0	0	NA	0	0	NA	0	0	0	NA	0	0	NA	0	NA	0	NA
CH157	10.2801	-5.98743	-7.99311	NA	2	2	2	2	2	2	2	0	0	0	0	0	0	0	0	0	0	0	0	0	0	0	0	0	0	0	0	0	0	0	0	0	0	0	0	0	0	NA	0	0	0	0	0	0	0
CH159	14.1619	3.70672	1.38748	2	2	2	2	2	2	0	0	0	0	0	0	0	0	0	0	0	0	0	0	0	0	0	NA	0	0	0	0	0	0	0	0	0	0	0	0	0	0	NA	NA	0	0	0	0	0	0
CH160	-0.879819	-4.81762	-2.21021	2	2	2	2	2	2	2	2	2	2	2	2	NA	2	2	2	2	2	2	2	2	2	2	NA	2	2	2	2	2	2	2	2	2	2	2	2	2	2	2	NA	2	2	2	NA	2	2
CH161	-14.9511	-5.4625	-1.58694	2	2	2	2	2	2	2	2	2	2	2	2	2	2	2	2	2	2	2	2	2	2	2	2	2	0	2	0	0	0	0	0	0	0	0	0	0	0	0	0	0	0	0	0	0	0
CH163	15.6175	5.51913	-1.43584	2	2	2	2	2	2	2	2	2	2	2	2	2	2	2	2	2	2	2	2	2	2	2	2	2	2	2	2	2	2	2	2	2	2	2	2	2	2	2	2	2	2	2	2	2	2
CH164	20.4697	8.2908	-5.19106	2	NA	2	2	2	2	2	2	0	0	0	0	0	0	0	0	0	0	NA	0	0	0	0	NA	0	0	0	0	0	0	0	0	0	0	0	0	0	NA	2	0	0	0	0	0	0	0
CH165	-13.4954	-4.50061	-3.80317	0	0	0	0	0	0	0	0	0	0	0	0	0	0	0	0	0	0	0	0	0	0	0	NA	0	0	0	0	0	0	0	0	0	0	0	0	0	0	NA	0	0	0	0	0	0	0
CH166	14.1619	-5.90476	5.93722	NA	NA	NA	2	2	NA	2	2	NA	0	NA	0	NA	NA	NA	NA	0	0	0	0	0	0	2	NA	0	0	2	2	NA	2	NA	2	2	0	2	2	NA	0	NA	NA	2	2	2	NA	NA	0
CH168	-2.82068	-1.68791	-3.86614	0	0	0	0	0	0	0	0	2	2	2	2	2	2	2	2	2	2	2	2	2	2	2	NA	2	2	2	2	NA	2	2	2	2	2	2	2	2	2	2	2	2	2	2	NA	2	2
CH169	8.8245	11.355	2.34216	0	0	0	0	0	0	0	0	2	2	2	2	NA	2	2	2	2	2	2	2	2	2	2	NA	2	NA	2	2	2	2	2	2	2	2	2	2	2	2	NA	2	2	2	2	NA	2	2
CH170	18.5288	5.05272	-0.9304	NA	2	2	2	0	0	0	0	NA	2	0	0	NA	0	NA	0	0	0	0	0	0	0	2	NA	2	0	2	2	2	2	2	2	2	2	0	0	2	2	NA	0	0	0	0	0	0	0
CH171	-7.67284	-1.05046	5.5467	NA	NA	2	2	2	2	2	2	2	2	2	2	NA	2	2	0	NA	0	0	0	0	0	0	0	0	0	0	0	0	0	0	0	0	0	0	0	0	0	0	0	2	2	NA	NA	0	0
CH172	-8.64328	5.42193	8.90901	0	0	0	0	0	0	0	0	0	0	0	0	0	NA	0	0	0	0	0	0	0	2	2	2	2	2	2	2	NA	2	2	2	2	2	2	2	2	2	2	2	2	2	2	NA	2	2
[truncated: 1,929 more columns]
