# Supplementary material for: Comparison of Genomic Selection Models to Predict Flowering Time and Spike Grain Number in Two Hexaploid Wheat Doubled Haploid Populations
Source: Oxford University Press journal article supplement (doi:10.1534/g3.115.019745), 2015-07-24
Supplement: 019745_files2.xlsx [file 019745_files2.xlsx]

## Sheet: SA_1483snps
id	TYM	SGNC	SGNO	66	84	88	98	103	125	132	149	230	242	243	251	260	344	429	439	451	466	468	487	537	541	559	576	635	713	764	833	839	865	899	917	961	965	967	1008	1040	1190	1225	1339	1369	1415	1427	1524	1543	1581
SA2	-21.6017	0.895017	-3.96254	NA	2	0	0	0	0	0	2	0	2	2	0	0	2	0	0	2	0	0	0	0	0	0	2	NA	2	2	2	2	0	0	2	0	2	0	NA	0	0	0	2	2	0	0	0	2	0
SA3	-4.12047	3.6543	11.3128	2	2	2	0	2	0	2	0	0	2	0	0	2	2	0	NA	2	2	0	2	2	2	0	0	NA	2	0	0	2	0	2	0	0	2	0	NA	2	0	2	2	2	0	0	0	0	2
SA4	-16.4046	-4.58939	-5.03149	0	2	2	0	0	0	2	0	2	NA	2	2	2	2	0	NA	2	2	0	0	2	2	0	2	0	2	2	0	2	2	0	2	NA	0	0	2	0	2	0	0	2	2	0	0	0	0
SA5	-17.822	2.1286	6.06719	0	0	2	2	0	2	NA	2	0	NA	0	0	NA	2	0	0	2	2	2	0	2	2	2	0	2	2	0	2	2	2	2	2	0	0	2	NA	2	0	2	0	0	0	0	0	2	2
SA6	-16.4046	-7.68069	-7.66743	0	0	2	0	2	0	NA	2	2	2	0	0	0	0	0	NA	0	2	0	0	2	2	0	2	0	0	2	2	0	2	2	2	2	2	2	2	0	0	0	0	0	2	0	0	2	0
SA7	-15.9321	4.85694	-7.31164	0	0	2	2	NA	2	2	2	0	2	2	2	2	2	2	NA	2	2	2	0	2	0	0	2	NA	2	0	2	2	0	2	2	0	2	0	NA	2	2	0	0	2	0	2	2	2	2
SA8	-13.5698	6.05769	-8.73158	0	0	2	0	2	0	NA	0	2	2	0	2	2	2	2	2	0	0	0	0	0	0	0	0	NA	0	0	0	0	2	2	2	2	2	0	2	2	2	2	0	0	2	2	2	0	0
SA9	-19.7118	-2.53625	-7.25123	0	0	0	0	0	0	NA	0	0	2	2	0	2	0	2	0	2	2	0	0	2	2	0	0	NA	2	2	0	2	0	2	0	NA	0	2	0	0	2	2	2	0	0	0	2	0	0
SA10	-14.9872	-3.72623	-4.47656	0	0	2	2	NA	2	2	2	0	0	0	0	NA	2	0	0	2	2	2	0	2	2	2	0	2	2	0	2	2	2	2	2	NA	0	2	NA	2	0	2	0	0	0	0	0	2	2
SA11	7.69116	-6.73241	-4.13082	0	2	2	2	2	2	2	0	0	NA	2	2	NA	2	2	NA	2	2	2	2	2	2	2	0	2	0	0	0	2	0	2	2	0	2	2	2	2	2	0	0	2	0	0	2	0	2
SA12	-7.90019	-4.13475	-6.1555	0	0	2	2	0	2	NA	2	0	NA	0	0	2	2	0	NA	2	2	2	0	2	2	2	0	NA	2	0	2	2	2	2	2	0	NA	2	NA	2	0	2	0	0	0	0	0	2	2
SA13	0.604182	-7.13533	-2.80138	NA	0	0	2	2	0	0	0	0	NA	0	2	NA	2	0	NA	2	0	0	2	0	0	2	NA	NA	0	0	0	2	2	0	2	0	2	2	0	0	0	0	0	0	2	0	0	0	0
SA15	49.2681	5.06987	0.301559	2	0	2	2	NA	2	0	0	0	2	2	0	NA	2	0	2	0	0	2	2	2	2	NA	2	0	0	2	0	0	2	2	2	0	2	2	2	2	0	2	2	0	2	NA	0	0	NA
SA16	-8.84512	-1.08235	2.15127	NA	0	0	0	2	0	2	0	0	2	2	0	NA	0	2	0	0	2	0	NA	2	0	0	2	0	2	2	0	0	0	2	2	0	0	0	NA	0	2	2	0	2	0	2	2	2	0
SA17	-20.6567	-1.46078	-0.482891	NA	0	2	0	NA	0	2	2	2	NA	2	2	NA	2	0	0	0	2	0	2	0	2	0	0	0	2	0	0	0	2	0	0	NA	0	2	NA	0	0	0	2	0	2	2	0	0	0
SA20	46.9057	9.29937	-0.0849523	NA	2	0	0	NA	0	NA	2	2	NA	0	2	NA	0	0	NA	0	2	0	2	2	0	0	0	0	0	2	2	0	2	2	0	0	2	2	2	0	2	0	0	0	0	2	0	2	0
SA21	30.3695	-10.2877	-3.47521	2	2	2	2	0	2	2	0	0	2	2	0	NA	2	2	NA	0	2	2	2	2	0	2	2	NA	0	2	0	0	0	2	0	2	2	0	2	2	0	0	2	0	2	2	2	0	2
SA22	-13.5698	7.98287	9.39679	0	0	0	2	0	2	NA	2	0	2	0	2	2	2	0	NA	2	2	2	0	2	2	2	2	NA	0	0	2	2	0	0	2	0	2	2	0	2	2	0	0	2	0	2	0	0	2
SA23	-16.877	3.41696	4.81858	0	2	0	0	2	0	NA	0	0	2	0	0	NA	2	2	NA	2	2	0	2	2	2	0	0	NA	2	0	0	2	0	0	0	0	0	2	2	0	0	2	0	2	2	2	0	0	0
SA24	10.9984	13.5328	19.0636	0	0	2	2	2	2	NA	2	0	2	0	0	NA	2	0	NA	0	2	2	0	2	0	2	0	0	2	2	2	0	0	2	0	0	0	2	NA	0	0	0	2	0	0	2	0	2	2
SA25	-16.4046	10.6471	-4.02861	2	2	2	0	2	0	2	0	0	2	0	2	NA	2	0	2	0	2	0	2	2	2	0	0	NA	2	2	0	0	0	2	0	0	2	0	2	0	0	0	2	0	2	0	0	0	0
SA26	-0.813212	7.77111	2.41196	NA	0	2	2	NA	2	NA	2	0	NA	0	0	0	2	0	NA	0	2	2	0	2	0	2	0	0	2	2	2	0	0	2	0	0	0	2	NA	0	0	0	2	0	0	2	0	2	2
SA27	-16.877	-6.10815	-2.39555	NA	2	2	0	NA	2	0	2	0	NA	0	0	2	2	2	0	2	NA	2	2	0	2	0	0	2	0	2	2	2	0	0	0	0	0	0	2	2	2	0	0	2	0	2	2	2	2
SA28	-14.9872	-1.96624	-4.32803	0	2	0	0	2	0	2	0	0	2	0	0	NA	2	2	2	2	2	0	2	2	2	0	0	0	2	0	0	2	0	0	0	0	0	2	2	0	0	2	0	2	2	2	0	0	0
SA29	-21.6017	-3.24233	-3.03633	0	0	0	0	2	0	0	2	2	NA	2	2	2	2	2	2	2	0	0	0	0	0	0	0	0	2	0	2	2	0	0	0	0	0	2	0	0	2	0	2	0	0	2	2	2	0
SA30	-18.7669	-3.26809	-1.56315	2	2	2	2	0	2	0	0	0	NA	0	0	2	2	0	0	2	0	2	0	2	0	2	2	NA	2	2	0	2	0	2	0	NA	2	2	0	2	2	0	0	0	0	2	0	2	2
SA31	8.16362	8.02078	8.42565	0	2	2	2	2	0	2	0	0	NA	0	0	2	0	2	0	2	2	0	0	2	0	2	0	0	2	0	2	2	0	2	0	NA	2	2	0	0	2	0	2	2	0	2	2	2	0
SA32	-16.4046	-8.00398	-7.80616	2	2	2	2	NA	2	0	0	0	NA	0	0	2	2	0	0	2	0	2	0	2	0	2	2	2	2	2	0	2	0	2	0	NA	2	2	NA	2	2	0	0	0	0	2	0	2	2
SA33	14.7781	-0.0390175	7.02455	NA	0	2	2	2	2	NA	2	0	0	0	0	2	0	0	0	0	2	2	NA	0	2	2	0	2	2	0	2	0	2	0	2	2	2	0	2	2	2	0	2	0	2	0	2	2	2
SA34	4.85637	-8.07867	3.84745	0	2	2	2	2	0	NA	0	0	2	0	0	NA	0	2	NA	2	2	0	0	2	0	2	0	0	2	0	2	2	0	2	0	NA	2	2	0	0	2	0	2	2	0	2	2	2	0
SA35	-6.01033	1.4359	6.88045	0	0	0	2	0	2	0	0	0	0	2	0	0	2	2	0	0	0	2	0	0	0	2	0	2	2	2	0	0	0	0	0	0	2	2	2	2	2	2	2	0	0	2	2	0	2
SA36	-21.6017	-0.378563	-4.57326	0	0	0	0	0	0	2	2	2	2	2	2	0	2	2	2	0	2	0	0	2	0	0	2	0	0	2	2	0	0	2	0	0	0	2	2	0	0	0	2	0	0	2	2	2	0
SA37	35.0941	-0.889951	0.42339	2	0	2	2	2	2	0	0	0	2	0	0	NA	0	2	NA	2	0	2	0	2	0	2	2	2	2	0	0	2	2	2	0	0	0	2	NA	2	0	0	2	2	0	0	2	0	2
SA38	-18.7669	0.184565	4.31655	NA	0	0	2	NA	2	2	2	2	NA	2	0	NA	2	2	0	0	2	2	2	2	0	2	0	2	0	2	2	0	2	2	2	0	2	2	2	2	0	2	0	2	2	0	2	2	2
SA39	-19.2393	-1.94556	2.82147	2	0	2	0	NA	2	0	2	0	0	2	0	NA	0	0	0	0	0	2	0	2	2	0	2	2	0	0	2	0	2	2	0	NA	NA	0	0	2	0	0	2	0	NA	2	0	2	NA
SA40	-4.59293	-4.38052	-3.92162	2	0	2	2	2	2	NA	2	0	0	0	0	2	0	0	0	0	2	2	0	0	2	2	0	2	2	0	2	0	2	0	2	2	2	0	NA	2	2	0	2	0	2	0	2	2	2
SA41	-6.01033	-1.78604	-0.961103	0	0	0	0	2	0	2	0	0	NA	0	0	NA	2	0	2	2	2	0	0	2	2	2	0	0	2	2	2	2	0	2	0	NA	2	2	0	0	0	2	2	2	2	0	0	2	0
SA42	-14.5147	5.80759	-5.30896	0	2	2	2	2	2	NA	0	2	0	2	0	2	2	2	0	0	2	2	2	2	0	2	0	2	2	0	0	0	2	2	2	0	0	0	0	2	2	2	0	2	0	0	2	0	2
SA43	47.3782	1.61966	5.7359	2	2	2	0	0	0	2	0	2	2	2	2	NA	2	2	NA	2	2	0	0	2	0	0	0	0	0	2	0	0	2	0	2	0	0	0	0	0	0	2	0	0	0	2	2	0	0
SA44	44.5434	3.88695	-1.45535	0	2	2	0	2	0	NA	2	0	0	0	0	NA	0	2	0	2	2	0	2	2	0	0	0	NA	2	0	2	2	0	2	2	2	0	0	0	0	0	0	0	2	2	0	2	2	0
SA45	39.8188	-11.2469	-6.66731	0	2	2	0	2	0	2	2	0	0	0	0	0	0	2	0	2	2	0	2	2	0	0	0	0	2	0	2	2	0	2	2	2	0	0	0	0	0	0	0	2	2	0	2	2	0
SA46	41.2362	-1.00147	-1.07358	NA	0	0	2	2	2	0	2	0	NA	0	2	0	0	2	0	2	0	2	0	0	2	2	0	2	2	0	2	2	0	0	0	0	0	2	0	2	0	0	2	2	0	2	2	2	2
SA47	-8.37265	5.17679	13.0939	0	2	2	2	2	2	0	2	0	NA	0	2	2	2	0	2	0	0	2	0	0	2	2	2	NA	2	2	2	2	0	0	0	0	2	2	0	2	0	0	0	2	0	0	0	2	2
SA48	-17.822	0.368116	8.63254	0	0	2	0	2	0	0	2	0	2	2	0	2	2	0	0	2	0	0	0	0	0	0	0	0	0	0	2	2	0	0	2	0	2	2	NA	0	2	2	0	2	0	2	0	2	0
SA49	-3.17554	-2.33764	5.92845	0	2	0	0	0	0	2	0	0	NA	2	2	2	0	0	2	2	2	0	2	2	2	0	2	0	2	0	0	2	0	2	2	0	2	0	2	0	0	2	0	2	2	0	0	NA	0
SA50	-18.7669	-9.15013	-7.37382	NA	2	0	0	2	0	NA	2	0	NA	2	2	NA	0	2	NA	0	2	0	0	2	2	0	2	2	2	0	2	0	0	0	2	2	0	2	2	2	2	NA	0	2	0	0	2	2	2
SA51	51.6304	-1.26027	1.07278	NA	2	0	2	NA	0	2	0	2	2	0	2	NA	0	0	0	0	2	0	2	2	2	2	NA	NA	0	0	2	2	2	2	0	0	0	2	NA	0	2	0	0	2	0	0	0	2	0
SA52	2.02158	-4.67905	-2.31813	0	0	0	0	2	0	2	0	0	0	0	0	NA	2	0	NA	2	2	0	0	2	2	2	0	NA	2	2	2	2	0	2	0	0	2	2	NA	0	0	2	2	2	2	0	0	2	0
SA53	-20.1843	-0.391295	2.19213	2	0	2	0	0	0	0	2	0	2	2	2	2	2	2	0	0	0	0	0	0	0	0	0	NA	0	2	2	0	0	0	0	0	2	2	NA	0	2	0	0	0	0	2	2	2	0
SA54	2.96651	9.315	1.88537	NA	0	0	0	0	0	0	0	2	NA	2	0	NA	2	0	2	2	0	0	0	2	2	0	0	0	2	2	0	2	2	2	0	0	0	2	0	0	0	2	NA	2	0	0	0	0	0
SA55	-23.0191	-13.3898	-6.28374	0	0	2	2	2	0	2	0	0	0	0	2	NA	2	2	0	2	2	2	NA	2	2	2	2	NA	2	0	0	2	0	0	0	2	2	2	2	0	0	0	2	2	2	0	2	0	0
SA56	-18.7669	-12.4525	-8.69995	NA	0	0	0	0	0	NA	0	2	2	0	2	NA	2	0	NA	0	2	0	0	2	2	0	2	2	0	0	0	0	2	2	2	2	2	0	2	0	0	2	2	0	2	0	0	0	0
SA57	-16.877	1.21399	0.259159	NA	2	0	0	2	0	NA	2	2	NA	0	2	2	0	2	NA	2	0	0	2	2	0	0	0	NA	2	2	0	2	2	2	2	0	2	0	NA	0	2	0	0	2	0	0	2	0	0
SA58	-7.90019	-4.67407	-7.31164	NA	2	2	2	2	2	NA	0	0	NA	2	0	2	2	0	NA	0	2	2	NA	2	NA	2	2	2	2	0	0	0	0	0	2	2	0	2	NA	2	2	2	0	0	2	0	0	NA	2
SA59	31.3144	-5.1626	-5.82591	0	0	2	2	2	2	NA	0	0	NA	NA	2	2	0	2	NA	2	0	2	NA	2	0	0	2	2	0	2	2	2	0	0	0	2	0	2	2	2	2	0	2	2	2	2	2	NA	2
SA60	37.9289	-9.93473	0.545222	0	0	2	2	NA	2	NA	0	0	NA	2	2	2	0	2	NA	2	0	2	NA	2	0	0	2	2	0	2	2	2	0	0	0	2	0	2	NA	2	2	0	2	2	2	2	2	NA	2
SA61	-20.6567	4.66395	-8.63856	0	2	2	2	2	2	NA	2	0	2	0	0	2	2	0	0	2	0	2	0	0	0	2	2	2	0	0	2	2	0	0	0	2	0	2	NA	2	2	0	2	2	2	0	0	2	2
SA62	-5.0654	4.20382	7.36778	NA	2	0	2	NA	2	NA	2	NA	2	0	2	NA	2	0	NA	0	2	2	2	2	2	0	NA	2	2	2	2	0	0	2	2	0	0	2	NA	2	2	NA	0	0	0	2	0	2	2
SA63	41.7086	-9.3363	-3.78705	NA	2	2	0	0	0	NA	2	2	NA	2	0	2	2	0	NA	2	2	0	2	2	0	0	2	NA	2	0	2	2	2	2	0	2	2	2	NA	0	2	2	2	2	2	2	0	2	0
SA64	3.91144	2.36139	9.30248	NA	0	2	0	2	0	2	2	0	2	2	2	NA	2	2	NA	2	2	0	0	2	2	0	2	NA	2	2	2	2	0	2	0	0	2	0	0	0	2	2	0	2	0	2	2	2	0
SA65	-20.1843	-1.07948	-8.08363	0	2	2	2	2	2	NA	2	0	2	0	0	2	2	0	0	2	0	2	0	0	0	2	2	2	0	0	2	2	0	0	0	2	0	2	2	2	2	0	2	2	2	0	0	2	2
SA66	-20.1843	-6.30801	0.101647	NA	0	0	0	NA	0	NA	0	2	NA	0	2	0	2	0	NA	0	2	0	0	2	2	0	2	2	0	0	0	0	2	2	2	2	2	0	2	0	0	2	2	0	2	0	0	0	0
SA67	-20.1843	-3.5462	3.43125	2	0	2	0	NA	0	NA	2	0	2	2	2	2	2	2	0	0	0	0	0	0	0	0	0	0	0	2	2	0	0	0	0	0	2	2	NA	0	2	0	0	0	0	2	2	2	0
SA68	1.54911	-0.571311	1.83892	NA	2	2	2	NA	2	NA	0	0	NA	0	2	NA	0	0	NA	0	2	2	2	2	2	2	2	2	0	0	0	0	2	2	2	0	0	2	0	2	0	NA	2	0	0	0	0	NA	2
SA69	-5.53786	4.73253	17.358	NA	2	2	NA	NA	0	NA	NA	0	NA	NA	2	NA	0	0	0	NA	NA	0	2	2	0	0	0	0	NA	0	NA	0	NA	2	2	NA	2	NA	2	0	0	NA	NA	NA	2	NA	0	NA	NA
SA70	37.4564	-2.57482	-2.53429	NA	2	2	0	NA	0	NA	2	2	NA	2	0	2	2	0	NA	2	2	0	NA	2	NA	0	2	NA	2	0	2	2	2	2	0	2	2	2	NA	0	2	2	2	2	2	2	0	NA	0
SA74	-16.4046	2.08948	-8.4703	NA	0	2	NA	2	0	NA	0	0	2	0	NA	0	2	0	NA	NA	NA	0	NA	0	0	0	2	NA	2	2	0	2	0	NA	2	0	0	0	0	0	0	0	2	NA	0	NA	0	NA	NA
SA75	-17.3495	-3.15681	-3.78289	0	0	2	0	2	0	0	0	0	2	0	0	0	2	0	NA	2	0	0	0	0	0	0	2	0	2	2	0	2	0	0	2	NA	0	0	0	0	0	0	2	2	0	0	0	0	0
SA76	43.5985	6.29553	-2.50056	NA	0	2	2	2	2	2	2	0	0	2	2	NA	0	0	NA	0	2	2	2	2	0	2	0	2	0	0	2	0	0	2	0	NA	2	2	NA	2	2	0	2	0	0	0	0	2	2
SA77	-21.1292	0.447855	-7.69286	NA	0	0	2	0	2	NA	0	0	NA	2	0	0	0	0	0	2	2	2	0	2	2	2	0	2	2	2	2	2	0	2	0	0	2	0	0	2	2	2	2	2	0	0	0	2	2
SA78	-4.59293	12.6572	12.0111	0	2	0	0	NA	0	2	2	2	2	0	2	NA	2	0	0	2	2	0	2	2	0	0	0	2	0	2	2	2	2	0	0	0	0	0	NA	2	0	2	0	2	0	2	0	2	0
SA79	-3.648	11.5865	-1.28225	NA	2	0	2	0	2	0	2	NA	NA	0	0	0	0	0	NA	NA	NA	2	NA	2	2	2	NA	2	0	2	2	0	2	2	2	0	2	NA	0	2	0	0	2	2	0	NA	0	2	2
SA80	-21.1292	-2.65852	-1.97935	0	0	0	2	0	2	NA	0	0	NA	2	0	0	0	0	0	2	2	2	0	2	2	2	0	2	2	2	2	2	0	2	0	0	2	0	0	2	2	2	2	2	0	0	0	2	2
SA81	42.1811	6.81698	1.90518	NA	0	2	2	NA	2	2	2	0	0	2	2	NA	0	0	2	0	2	2	2	2	0	2	0	2	0	0	2	0	0	2	0	0	2	2	NA	2	2	0	2	0	0	0	0	2	2
SA82	-20.6567	-3.09428	5.92845	NA	0	2	0	2	0	NA	2	2	NA	0	0	2	2	2	0	2	0	0	0	0	0	0	0	NA	0	0	2	2	0	0	2	0	2	0	NA	0	2	2	2	2	0	2	2	2	0
SA83	-22.0741	-2.24462	-7.11249	0	0	0	0	2	0	0	2	0	2	0	0	NA	2	0	0	2	0	0	0	0	0	0	0	0	0	0	2	2	0	0	0	2	2	2	NA	0	0	0	2	0	0	0	0	2	0
SA85	29.4245	-6.00176	5.41848	NA	2	0	2	NA	2	0	0	0	0	2	0	NA	2	2	2	2	2	2	2	0	0	2	2	NA	0	0	0	2	0	0	0	0	2	0	0	2	0	2	2	2	0	0	2	0	2
SA86	34.6217	6.97441	1.60922	NA	2	NA	NA	NA	NA	0	NA	0	0	NA	NA	NA	NA	NA	NA	2	NA	NA	2	0	0	NA	NA	0	0	NA	0	2	0	0	0	0	2	0	0	NA	0	NA	NA	2	0	0	NA	0	NA
SA88	35.0941	15.3986	9.31708	0	0	2	2	NA	0	NA	0	0	2	NA	0	NA	0	2	0	0	2	0	0	2	2	2	0	0	0	0	0	0	0	2	0	2	2	0	2	0	0	2	0	2	0	2	2	0	0
SA89	42.1811	-10.009	-2.08435	0	2	0	2	2	2	0	2	2	2	2	0	NA	0	2	0	0	0	2	2	0	0	2	2	NA	2	2	2	0	0	0	0	2	NA	0	2	2	0	0	2	0	2	0	2	2	2
SA93	-2.70307	-0.455259	-3.12576	0	0	0	2	0	2	2	0	0	2	0	2	NA	0	2	2	0	2	2	0	2	0	2	0	NA	2	0	0	0	0	2	2	0	2	0	0	2	0	2	2	0	0	2	2	0	2
SA94	-21.1292	-5.07748	-1.42442	NA	0	0	2	2	2	NA	0	0	0	0	2	2	0	2	2	2	0	2	2	2	0	0	0	NA	2	0	0	2	0	2	0	0	0	0	2	2	2	NA	2	2	0	2	2	0	2
SA95	-20.6567	5.92583	-4.06036	NA	2	2	2	2	2	0	2	0	NA	2	0	NA	2	2	2	2	0	2	2	0	0	2	0	0	0	0	2	2	0	0	2	0	0	0	NA	2	0	2	0	2	0	0	2	2	2
SA96	-18.2944	-0.263722	-8.77729	NA	0	0	2	NA	2	2	0	2	NA	0	0	NA	2	2	0	2	2	2	2	2	0	2	2	2	0	2	0	2	0	2	2	0	2	2	NA	2	2	0	0	2	2	0	2	2	2
SA97	-8.37265	15.0109	3.98618	2	0	2	2	NA	2	NA	2	2	NA	2	2	2	0	0	NA	0	2	2	0	2	0	2	2	2	0	2	2	0	2	2	0	0	0	2	NA	2	2	0	0	0	2	0	0	2	2
SA98	-19.2393	2.97775	-4.89276	0	0	2	2	NA	2	2	0	0	2	0	0	2	2	2	0	0	2	2	2	0	0	2	0	2	0	0	0	0	2	0	0	NA	2	2	2	2	2	0	0	0	2	0	2	0	2
SA99	56.355	21.6021	9.68257	2	0	2	2	NA	2	0	2	0	0	0	0	NA	0	2	2	0	0	2	2	0	2	2	0	2	2	0	2	0	0	0	2	0	0	0	0	2	2	0	0	0	2	2	2	2	2
SA100	-9.79005	3.42345	-0.59202	NA	2	2	0	2	0	NA	2	2	NA	2	2	NA	0	0	NA	0	2	0	2	2	2	0	2	NA	2	2	2	0	2	2	2	NA	2	2	2	0	0	NA	2	0	2	2	0	2	0
SA101	45.0159	1.05406	-0.59202	0	0	0	2	0	2	NA	0	0	NA	2	0	NA	0	0	0	0	0	2	NA	0	0	2	0	NA	2	2	2	0	0	0	2	0	2	0	NA	2	0	2	2	0	2	2	0	0	2
SA102	9.10855	5.20381	3.25349	0	2	0	2	NA	2	0	2	0	0	2	2	2	2	0	NA	0	0	2	2	0	2	2	2	0	0	2	2	0	0	0	0	NA	2	2	2	0	0	0	0	0	2	0	0	2	0
SA103	-15.9321	-2.11588	-2.67302	0	0	0	2	NA	2	NA	0	0	2	0	0	2	2	2	0	0	2	2	0	2	2	2	2	2	0	2	0	0	2	2	2	0	2	2	NA	2	2	2	0	0	0	2	2	0	2
SA105	30.8419	2.65515	9.36329	2	0	2	2	NA	2	0	2	0	NA	0	2	NA	2	0	NA	2	0	2	0	0	0	2	0	NA	0	0	2	2	0	2	0	0	2	2	NA	2	0	0	2	2	2	2	0	2	2
SA106	-17.822	-4.72855	1.76645	0	0	0	0	2	0	NA	2	2	2	2	0	NA	0	0	NA	2	0	0	2	0	0	0	0	NA	2	0	2	2	2	0	2	0	2	2	0	NA	0	NA	2	2	0	0	0	2	NA
SA107	10.9984	3.48104	8.75437	2	0	2	0	NA	0	NA	0	0	NA	2	2	NA	0	0	0	0	2	0	0	0	0	2	0	NA	0	2	0	0	0	0	2	0	0	0	NA	0	0	NA	2	0	0	0	0	0	0
SA108	15.7231	-1.04281	9.00859	2	0	2	2	NA	2	0	2	0	NA	0	2	NA	2	0	NA	2	0	2	0	0	0	2	0	NA	0	0	2	2	0	2	0	0	2	2	NA	2	0	0	2	2	2	2	0	2	2
SA109	-18.2944	-4.74001	-2.53429	0	0	0	0	NA	0	0	2	2	NA	2	0	2	0	0	NA	2	0	0	2	0	0	0	0	NA	2	0	2	2	2	0	2	0	2	2	0	0	0	2	2	2	0	0	0	2	0
SA110	20.4477	0.979806	9.39679	NA	0	2	2	NA	2	0	2	0	2	0	2	NA	2	0	0	2	0	2	0	0	0	2	0	NA	0	0	2	2	0	2	0	NA	2	2	NA	2	0	0	2	2	2	2	0	2	2
SA111	-19.7118	-1.95386	-4.75402	0	0	0	0	2	0	NA	2	2	2	2	0	NA	0	0	0	2	0	NA	2	0	0	0	0	0	2	0	2	2	2	0	2	0	2	2	0	NA	0	0	2	2	0	0	0	2	NA
SA112	-20.6567	-2.60074	-6.10905	2	0	0	2	NA	2	NA	0	2	NA	2	0	2	0	2	NA	2	0	2	0	2	0	0	2	NA	0	2	0	2	2	2	2	NA	NA	0	0	2	0	0	2	2	2	0	2	0	2
SA113	-18.2944	-1.96235	-1.14695	NA	0	2	0	2	0	NA	2	2	NA	2	0	2	0	2	0	2	0	0	0	0	0	0	2	0	2	0	2	2	2	0	2	NA	0	2	0	0	2	0	0	2	0	2	2	2	0
SA114	-15.9321	1.03164	3.63478	0	0	2	0	NA	0	0	0	0	2	0	2	NA	0	2	2	0	0	0	2	0	0	0	0	2	0	0	0	2	0	0	2	0	2	2	2	0	0	0	0	2	2	0	2	0	0
SA115	3.43897	-1.26231	13.3815	0	0	2	2	NA	2	2	2	0	2	0	0	0	2	0	2	0	2	2	0	2	0	2	0	0	2	2	2	0	0	2	0	0	0	2	0	0	0	0	2	0	0	2	0	2	2
SA116	-13.0973	-3.17913	1.90518	NA	2	2	2	NA	2	NA	2	2	NA	0	0	2	2	0	NA	0	0	2	2	0	2	2	0	NA	0	2	2	0	0	2	2	NA	2	0	0	2	2	0	0	2	2	2	0	2	2
SA117	42.6536	5.70813	9.29609	2	2	2	2	2	2	0	0	0	2	2	2	NA	0	2	NA	2	2	2	2	0	2	2	2	NA	0	0	0	2	0	0	0	0	2	2	2	2	2	2	0	0	2	0	2	0	2
SA118	-17.822	-2.92051	1.21151	2	2	2	2	NA	2	2	0	2	2	2	2	NA	2	0	2	2	2	2	2	0	2	2	0	2	0	2	0	2	2	0	0	0	0	0	0	2	0	2	0	2	0	2	0	0	2
SA119	-14.9872	-2.78975	-0.519354	0	2	0	0	NA	0	0	0	2	NA	0	0	2	0	2	0	2	0	0	2	0	0	0	2	0	0	2	0	2	2	0	0	0	0	2	2	0	2	0	0	2	0	0	2	0	0
SA120	37.4564	4.67772	9.72902	NA	2	2	0	NA	0	NA	0	2	NA	2	2	NA	0	0	NA	2	2	0	2	NA	0	0	2	0	0	2	0	NA	0	0	0	NA	0	0	2	0	0	2	0	NA	2	2	0	2	0
SA121	-19.2393	0.0516636	-0.314553	NA	0	2	2	2	2	2	0	0	2	2	2	2	2	0	2	0	2	2	0	2	0	2	0	NA	0	0	0	0	0	2	0	0	2	0	2	2	2	0	0	0	0	0	0	0	2
SA122	-15.9321	-1.03431	-8.77729	NA	2	2	2	2	2	NA	0	0	NA	0	0	2	2	0	0	2	2	2	2	2	0	2	0	2	0	0	2	2	0	2	2	0	2	2	NA	2	0	0	2	2	2	0	0	2	2
SA123	-10.2625	-3.75454	1.76645	NA	0	2	2	2	2	0	2	0	NA	0	0	2	0	0	NA	2	0	2	0	0	0	0	2	2	0	0	2	2	2	0	0	0	2	2	2	2	0	0	0	2	NA	0	0	NA	2
SA124	1.54911	-2.13381	3.98618	0	0	0	2	0	2	2	0	2	2	2	0	2	0	2	NA	0	2	2	0	2	0	2	0	2	2	2	0	0	0	2	2	0	2	0	0	2	2	2	0	0	0	0	2	0	2
SA125	40.7637	4.62888	-2.01324	NA	2	2	0	2	0	0	2	0	NA	0	2	NA	0	0	0	2	0	0	2	0	0	0	0	NA	0	2	0	2	0	NA	0	0	0	0	NA	0	0	0	0	NA	NA	0	0	0	0
SA126	-14.9872	1.02796	-1.35165	2	2	2	2	2	2	2	0	2	2	2	2	NA	2	0	2	2	2	2	2	0	2	2	0	2	0	2	0	2	2	0	0	NA	0	0	0	2	0	NA	0	2	0	2	0	0	2
SA127	-10.735	-7.84368	0.795315	2	2	2	2	0	2	0	2	2	NA	0	0	0	0	2	0	0	0	2	2	0	2	2	0	2	0	2	2	0	2	0	2	2	2	0	2	2	0	2	0	0	2	2	2	2	2
SA128	-18.7669	-2.15688	6.62212	0	2	0	2	2	2	2	2	2	NA	2	2	NA	2	0	0	0	2	2	2	0	0	2	0	2	0	2	0	0	2	2	0	0	2	0	2	2	0	0	0	0	2	0	0	0	2
SA129	-10.2625	-3.10519	3.12973	0	2	0	2	2	2	NA	2	2	NA	2	2	0	2	0	0	0	2	2	2	0	0	2	0	2	0	2	0	0	2	2	0	NA	2	0	2	2	0	0	0	0	2	0	0	0	2
SA131	41.7086	1.26356	4.81858	NA	NA	2	0	0	0	NA	2	0	NA	2	2	NA	2	2	NA	0	2	0	0	0	2	0	2	NA	0	0	2	0	0	0	0	0	2	2	2	0	0	2	0	NA	0	0	2	2	0
SA132	-1.28568	2.08219	4.54112	2	2	2	2	2	2	0	2	2	NA	2	0	NA	2	0	NA	0	0	2	2	0	0	0	2	2	0	2	2	0	2	0	2	NA	0	2	NA	2	0	NA	2	0	0	2	0	NA	2
SA133	59.6623	2.27724	-0.193553	2	0	2	0	0	0	NA	0	0	NA	0	2	NA	0	2	2	2	2	0	NA	2	2	0	2	0	0	0	0	2	2	2	0	0	2	0	NA	0	2	0	2	2	0	2	2	0	0
SA134	37.9289	-10.1673	-9.66475	NA	0	0	0	0	0	NA	0	0	NA	2	2	NA	2	2	0	2	2	0	2	0	0	0	2	2	0	0	2	2	0	0	2	2	0	0	2	2	2	0	0	2	2	2	2	2	0
SA135	-22.5466	-8.37098	-8.91603	0	0	0	0	NA	0	NA	0	2	NA	0	0	NA	2	2	NA	2	2	0	0	0	2	0	2	NA	0	2	0	NA	2	0	2	0	2	0	NA	NA	0	0	0	2	2	0	2	0	0
SA136	-0.813212	3.77417	5.46493	NA	2	2	2	2	2	0	2	2	NA	2	0	NA	2	0	2	0	0	2	2	0	0	0	2	2	0	2	2	0	2	0	2	0	0	2	0	2	0	2	2	0	0	2	0	2	2
SA137	38.4014	-1.24026	2.30426	2	0	2	0	2	0	2	0	0	NA	0	0	0	2	2	0	2	2	0	0	2	0	0	2	0	0	0	2	2	0	0	0	0	2	2	NA	0	0	2	0	2	0	2	2	2	0
SA138	41.7086	-6.87042	-7.74287	NA	0	0	0	NA	0	2	0	0	0	2	2	NA	2	2	0	2	2	0	0	0	0	0	2	NA	0	0	2	2	0	0	2	2	0	0	2	2	2	0	0	2	2	2	2	2	0
SA139	-9.31758	10.6647	4.40238	0	0	2	0	NA	0	0	2	2	0	0	0	NA	2	0	0	2	2	0	2	0	2	0	0	0	0	2	2	2	2	2	2	2	2	0	2	0	2	0	2	2	2	2	0	2	0
SA140	36.984	-2.46931	0.240849	2	0	2	0	0	0	2	2	0	NA	2	2	0	2	2	2	0	2	0	0	0	2	0	2	0	0	0	2	0	0	0	0	0	2	2	2	0	0	2	0	0	0	0	2	2	0
SA141	-6.48279	21.6451	-0.453287	NA	2	2	2	2	2	0	NA	2	NA	2	0	NA	2	0	NA	0	0	2	2	0	0	0	2	2	0	2	2	0	2	0	2	NA	0	2	NA	2	0	NA	2	0	0	2	0	NA	2
SA143	-16.4046	-2.12644	-4.19909	0	2	0	0	2	0	0	0	0	2	2	0	NA	0	0	0	2	0	0	2	2	0	0	2	0	2	2	2	2	2	2	2	0	2	2	NA	0	0	0	2	2	2	2	0	NA	0
SA145	-13.0973	-9.49816	3.56998	2	0	2	2	2	2	NA	0	2	2	0	0	NA	2	2	2	0	2	2	0	2	2	2	0	NA	0	2	2	0	0	0	2	0	0	2	2	2	2	0	0	0	0	2	2	2	2
SA146	-19.2393	-6.67064	-8.91603	0	0	0	0	0	0	NA	0	2	NA	0	0	NA	2	2	NA	2	2	0	0	0	2	0	2	0	0	2	0	2	2	0	2	0	2	0	0	0	0	0	0	2	2	0	2	NA	0
SA147	-6.48279	-1.08235	-4.93057	NA	2	2	0	0	0	0	2	2	NA	2	0	2	0	0	NA	0	0	0	NA	0	2	0	0	NA	2	0	2	2	2	0	2	0	0	0	2	NA	2	0	2	2	2	0	0	NA	0
SA148	-18.7669	-3.78318	4.26365	NA	0	0	2	2	2	NA	2	0	0	2	2	NA	2	0	2	2	0	2	2	0	2	2	2	0	2	0	2	2	0	0	2	NA	2	0	NA	2	2	NA	2	2	2	2	0	NA	2
SA150	40.7637	7.96052	3.39026	NA	0	2	0	0	0	2	2	0	0	2	2	NA	2	2	NA	0	2	0	0	0	2	0	2	0	0	0	2	0	0	0	0	0	2	2	2	0	0	2	0	0	0	0	2	2	0
SA151	-21.1292	-0.218631	-7.52869	2	0	2	2	2	2	0	0	0	NA	2	0	2	0	2	0	2	0	2	0	2	2	2	2	2	2	2	0	2	0	2	2	0	2	2	0	2	2	2	0	2	2	0	2	0	2
SA152	-19.7118	-7.21159	-2.79996	NA	0	0	0	0	0	0	0	0	0	0	2	2	2	0	2	0	0	0	0	0	2	0	2	0	0	0	0	0	0	0	2	0	2	2	2	0	0	2	2	0	2	0	0	0	0
SA153	-18.2944	0.143061	1.62687	0	2	0	0	NA	0	0	0	2	2	2	2	NA	2	2	NA	0	0	0	2	0	2	0	2	0	2	2	0	0	0	2	2	0	2	0	2	0	0	0	0	0	2	0	2	0	0
SA154	-9.79005	-1.19787	0.934048	0	2	0	0	0	0	2	2	0	0	2	2	NA	2	2	NA	0	2	0	2	2	2	0	2	2	2	0	2	2	0	2	0	0	0	2	2	2	2	2	2	0	0	2	2	2	2
SA155	-20.6567	1.11945	-1.02949	NA	0	0	0	NA	0	2	0	0	2	2	0	0	2	2	2	0	2	0	0	2	0	0	0	0	2	0	0	0	0	2	0	0	0	2	NA	0	0	2	2	2	0	0	2	0	0
SA157	-14.5147	1.64284	-9.05476	2	0	2	2	2	0	0	2	2	0	0	0	2	2	2	0	0	0	0	2	0	2	2	0	NA	2	0	2	0	2	0	2	0	2	2	0	0	2	2	0	0	0	0	2	2	0
SA159	-6.48279	-2.91183	-2.91251	NA	NA	0	0	0	0	NA	2	2	NA	2	2	NA	2	0	NA	2	0	0	NA	NA	0	0	0	2	0	0	2	2	0	2	2	2	0	2	2	0	0	0	2	NA	2	0	0	NA	0
SA160	16.668	7.04364	-1.60129	2	0	2	0	0	0	0	2	0	NA	0	2	2	0	2	2	0	0	0	0	0	2	0	0	2	0	2	2	0	0	0	0	NA	2	0	2	2	2	2	0	0	2	2	2	2	2
SA161	11.9433	-0.0789601	5.05298	0	0	0	2	NA	2	2	0	0	NA	2	0	2	2	0	0	2	2	2	0	2	2	2	2	2	2	2	0	2	0	2	0	0	2	0	0	2	0	0	2	2	0	2	0	0	2
SA163	-9.79005	-10.9022	-4.76891	0	0	2	2	2	2	0	0	0	NA	2	2	0	0	2	0	0	0	2	0	0	0	2	0	0	2	2	0	0	2	0	2	0	0	0	2	2	0	2	0	NA	2	0	2	0	2
SA164	-22.5466	-3.3226	-1.97935	NA	0	0	0	0	0	0	0	2	NA	0	0	NA	2	0	0	0	NA	0	0	0	0	0	2	0	0	2	0	0	0	0	0	0	0	0	0	0	0	NA	2	0	0	0	0	0	0
SA165	6.27376	-5.97116	-3.62736	0	0	0	2	0	2	2	2	2	0	2	2	0	2	0	2	2	2	2	0	2	0	2	2	2	0	2	2	2	0	0	0	0	0	2	2	2	0	2	2	2	2	2	0	2	2
SA166	-19.7118	-1.35248	-8.36109	0	0	0	0	0	0	NA	0	2	NA	0	0	2	2	2	0	2	2	0	0	0	2	0	2	0	0	2	0	2	2	0	2	0	2	0	NA	0	0	0	0	2	2	0	2	0	0
SA167	-21.1292	4.21173	5.46493	0	2	2	2	2	2	2	2	2	2	2	2	NA	2	2	NA	2	2	2	2	2	2	2	0	2	0	2	2	2	2	2	0	0	0	2	2	2	0	2	2	2	2	0	2	2	2
SA168	10.5259	-1.67395	-2.98789	0	0	0	2	0	2	2	2	2	0	2	2	0	2	0	NA	2	2	2	0	2	0	2	2	2	0	2	2	2	0	0	0	0	0	2	2	2	0	2	2	2	2	2	0	2	2
SA169	-19.7118	6.10491	0.320574	0	0	0	2	0	2	NA	2	0	NA	2	2	0	0	0	2	2	2	2	0	2	0	2	2	2	0	0	2	2	0	2	2	0	0	2	0	2	0	0	2	2	2	2	0	2	2
SA170	-6.95526	-0.488235	-2.79068	0	2	0	0	0	0	NA	0	2	NA	2	2	2	2	2	NA	2	2	0	0	0	0	0	2	NA	2	2	0	2	2	2	0	0	0	0	0	0	2	2	2	2	0	0	2	0	0
SA171	-19.2393	-3.64031	-4.75402	2	0	2	0	NA	0	NA	0	2	NA	0	2	2	2	2	2	2	0	0	0	0	0	0	2	0	0	0	0	2	2	0	0	0	0	0	0	0	2	0	2	2	0	0	2	0	0
SA172	-22.0741	-3.39882	-8.91603	NA	0	0	2	NA	2	NA	0	2	2	2	0	2	0	2	NA	2	0	2	2	0	0	2	2	2	0	2	0	NA	2	0	0	0	0	2	0	2	2	NA	2	2	0	0	2	0	2
SA173	-19.7118	-0.156737	-8.36109	0	0	0	0	0	0	NA	2	2	2	2	0	NA	0	0	NA	2	2	0	0	2	2	0	2	0	2	0	2	2	2	0	2	0	2	0	0	0	0	0	2	2	0	0	0	2	0
SA174	-10.735	-4.1735	-4.75402	0	2	2	2	2	2	0	2	2	NA	2	0	2	0	2	NA	0	0	2	2	2	2	0	2	2	0	2	2	0	0	0	2	2	0	0	NA	2	2	2	0	0	0	0	2	2	2
SA175	1.07665	-2.6959	-1.94576	0	2	0	0	0	0	NA	0	2	2	2	2	2	2	2	NA	2	2	0	NA	0	0	0	2	0	2	2	0	2	2	2	0	0	0	0	NA	0	2	2	2	2	0	0	2	0	0
SA176	-21.1292	-0.894729	-5.96158	0	2	2	0	2	0	NA	2	0	2	2	0	2	2	0	0	0	0	0	0	2	2	0	0	NA	0	0	2	0	0	2	0	NA	0	0	0	0	0	2	2	0	0	2	0	2	0
SA177	-21.6017	1.09654	-5.91184	0	0	0	0	0	0	0	2	2	0	0	0	2	0	2	NA	0	0	0	0	0	0	0	2	0	0	2	2	0	2	0	0	0	0	2	0	0	2	2	0	0	0	0	2	2	0
SA178	-5.0654	-6.353	5.59809	2	2	2	0	2	0	0	0	0	0	2	2	2	0	2	2	2	0	0	2	0	2	0	2	0	0	2	0	2	0	0	2	0	2	2	NA	0	2	2	0	2	0	0	2	0	0
SA117a	-11.2074	-3.46216	1.6417	2	0	0	2	0	2	NA	0	0	NA	2	0	NA	0	0	0	0	2	2	0	2	2	0	2	2	2	0	0	0	0	2	2	0	NA	2	2	2	0	NA	0	0	0	0	0	0	2
[truncated: 1,437 more columns]
