# Supplementary material for: Comparison of Genomic Selection Models to Predict Flowering Time and Spike Grain Number in Two Hexaploid Wheat Doubled Haploid Populations
Source: Oxford University Press journal article supplement (doi:10.1534/g3.115.019745), 2015-07-24
Supplement: 019745_files3.xlsx [file 019745_files3.xlsx]

## Sheet: CH+SA_common808snps
id	TYM	SGNC	SGNO	1	18	36	64	149	167	169	186	235	238	251	261	285	329	335	343	401	414	451	461	490	505	515	538	547	576	616	630	633	726	736	865	877	895	907	951	965	967	982	985	1014	1030	1092	1116	1119	1166
CH1	19.9845	11.8004	4.54823	2	0	2	2	2	2	0	NA	2	0	0	2	0	2	2	2	NA	2	NA	NA	2	0	0	NA	2	0	0	NA	2	2	2	0	NA	0	0	2	2	2	0	2	0	NA	0	2	2	0
CH2	-17.3772	-5.9517	-7.75242	2	2	0	2	0	2	2	0	0	2	2	2	2	2	0	0	0	0	0	2	0	2	0	2	0	2	0	0	0	0	2	0	0	2	0	2	2	0	2	0	2	0	2	0	2	2
CH3	-6.2172	0.224241	6.87257	0	2	2	2	0	2	0	2	2	0	0	2	2	0	2	0	2	2	2	2	0	2	2	2	0	2	2	2	2	0	0	0	2	2	NA	2	0	2	0	2	0	2	2	0	0	2
CH4	19.014	6.58427	1.3954	2	0	0	2	0	2	0	0	2	0	2	2	0	2	2	0	2	2	2	2	0	2	2	2	0	0	2	0	2	0	NA	2	0	0	2	2	0	2	2	0	0	2	2	2	2	2
CH5	-18.3476	-4.38377	-4.64895	0	0	2	0	2	0	0	2	0	0	0	0	0	0	0	2	NA	0	2	0	0	2	0	2	0	2	0	0	2	2	NA	0	2	0	2	0	0	2	0	0	0	2	0	0	2	0
CH6	-13.9807	1.48582	-2.92576	0	2	0	0	2	0	2	2	2	0	2	0	0	0	0	0	0	0	0	2	2	0	2	NA	0	0	0	0	2	0	NA	2	0	0	2	0	0	2	2	2	0	0	0	0	0	2
CH7	-15.9215	-4.27187	-5.37427	2	0	2	2	2	0	2	0	2	2	2	2	2	2	2	0	2	2	0	2	0	2	0	2	0	2	0	2	0	0	2	0	0	0	0	2	0	0	0	0	2	0	0	0	0	2
CH8	11.2506	-4.46492	-5.83642	2	0	2	0	2	0	0	0	0	2	0	0	0	2	2	2	NA	2	2	2	0	2	0	0	0	2	0	2	0	2	NA	0	2	2	0	0	2	0	0	0	2	2	2	2	2	0
CH9	-1.85025	-5.0749	-8.21627	2	0	NA	0	0	0	0	0	2	0	2	0	2	2	2	0	0	2	2	0	2	2	0	NA	0	0	0	0	2	0	2	NA	0	2	0	0	0	2	NA	2	0	2	0	2	2	2
CH10	3.48712	2.73183	5.09554	NA	2	0	2	0	2	2	NA	NA	2	0	2	0	NA	0	2	NA	2	0	NA	2	2	2	NA	0	0	NA	0	0	2	NA	2	2	0	0	2	2	0	2	2	NA	0	2	2	NA	0
CH11	-12.525	-6.49089	-0.136581	2	0	2	2	0	2	2	0	0	2	0	2	NA	2	2	0	NA	0	0	0	2	2	2	2	2	2	2	2	0	0	NA	0	2	0	0	2	2	0	0	2	2	2	0	0	2	2
CH12	-13.9807	-3.20793	-0.786021	0	NA	NA	0	2	0	2	2	2	NA	NA	NA	0	0	0	NA	0	0	NA	0	0	2	0	2	0	0	0	NA	NA	0	NA	NA	0	0	NA	0	NA	0	2	2	2	NA	0	0	0	2
CH13	-4.76155	-2.84835	10.0427	2	0	0	0	2	2	0	0	2	2	0	0	0	2	0	2	2	0	2	0	0	0	0	2	2	0	2	0	0	2	NA	2	2	0	2	0	0	0	2	2	2	2	0	2	2	2
CH14	4.45756	8.97865	6.33933	0	2	2	0	2	0	2	2	2	0	0	0	0	0	2	2	2	0	0	2	2	0	2	2	0	0	0	2	2	2	NA	0	2	0	0	0	NA	0	0	2	0	0	0	0	0	0
CH16	19.4993	1.44263	0.0148956	2	2	0	2	2	2	2	0	0	0	2	2	0	2	2	0	NA	2	0	0	0	2	0	2	2	0	0	2	2	0	2	2	0	2	NA	2	2	2	2	0	0	0	2	2	2	2
CH17	-1.85025	9.55707	3.66367	0	2	2	0	0	2	0	2	0	0	0	0	0	0	0	0	2	2	2	0	2	0	2	0	NA	0	2	0	2	0	0	0	2	0	0	0	0	2	0	0	0	NA	0	0	0	2
CH18	-15.9215	-5.64965	-5.99405	0	NA	0	0	2	0	2	NA	0	0	2	0	0	0	NA	0	NA	2	0	2	0	0	2	0	NA	2	0	0	2	0	NA	2	0	2	NA	0	0	NA	2	0	NA	NA	2	2	0	2
CH19	16.1027	1.20792	-3.03416	NA	2	2	0	0	2	0	2	0	0	0	0	0	NA	0	0	NA	2	2	0	2	0	2	0	0	0	NA	0	2	0	0	NA	2	NA	0	0	0	NA	0	0	0	NA	0	0	0	2
CH20	3.00191	10.6799	7.75932	0	0	0	2	0	0	2	2	NA	2	2	2	2	0	2	0	0	2	0	0	2	2	2	2	2	2	2	2	0	0	2	2	0	2	NA	2	2	2	2	0	2	0	2	0	0	0
CH21	14.6471	2.46264	3.64963	2	2	2	2	0	0	0	0	NA	2	2	2	2	2	0	0	2	0	2	2	2	0	2	0	0	0	0	0	0	0	NA	0	0	2	2	2	0	0	0	2	2	2	2	2	0	2
CH22	10.2801	-0.151517	2.44107	2	2	2	0	2	0	2	0	0	2	0	0	0	2	0	2	0	0	0	0	2	0	0	0	2	2	0	2	0	2	0	0	0	0	NA	0	0	0	0	2	2	0	2	0	0	0
CH23	1.06104	4.49044	0.0230657	2	2	2	2	0	2	0	0	2	0	2	2	NA	2	2	0	0	2	2	2	0	2	0	0	2	2	2	0	2	2	NA	0	0	2	0	2	0	2	0	0	0	2	2	2	0	2
CH24	-17.3772	-4.12575	-5.31591	NA	NA	NA	0	0	0	2	0	0	0	NA	NA	0	NA	NA	2	NA	0	0	NA	0	0	NA	0	NA	0	2	NA	2	NA	NA	NA	NA	2	NA	0	0	NA	2	0	0	0	NA	NA	0	NA
CH25	7.36885	-2.48134	-6.81029	2	0	0	0	0	0	2	0	0	2	0	0	2	2	2	0	0	2	0	2	2	2	2	2	0	2	2	0	0	0	0	2	2	0	2	0	0	0	2	2	2	0	2	0	0	NA
CH26	2.03148	0.650315	6.81274	0	2	0	2	2	2	0	2	0	2	2	2	0	0	2	2	2	2	2	2	2	0	2	2	0	2	0	2	0	2	0	2	0	0	0	2	0	2	2	0	2	2	2	0	0	0
CH27	-7.67284	-4.19839	-5.16877	2	0	0	2	2	0	0	0	NA	0	2	2	0	2	2	2	NA	2	2	2	2	2	2	0	2	2	2	2	2	2	NA	2	0	2	NA	2	0	2	2	0	0	2	2	2	2	0
CH28	-1.85025	3.34715	-5.16157	0	0	0	2	2	0	2	2	2	0	2	2	0	0	0	2	0	0	0	0	2	0	0	0	0	0	0	2	2	2	NA	2	2	2	2	2	2	2	2	2	0	0	2	2	2	0
CH29	-3.3059	3.08468	14.7744	2	2	2	2	0	2	2	0	0	0	0	2	0	2	0	2	0	2	0	0	0	0	2	2	0	2	2	2	2	0	0	0	NA	2	0	2	0	0	0	2	0	0	2	2	2	0
CH30	-2.82068	0.0711109	-1.97106	2	NA	0	0	2	0	2	0	2	0	0	0	2	2	2	2	0	2	0	0	0	NA	2	2	2	0	0	0	0	2	0	2	2	2	2	0	2	2	2	2	0	0	0	2	2	0
CH31	11.7358	3.44426	1.69917	0	0	2	2	2	2	0	2	0	2	2	2	2	0	0	2	0	0	2	0	0	0	2	0	2	2	0	2	0	2	2	0	0	0	0	2	0	0	0	2	2	2	2	0	2	0
CH32	-7.67284	5.00821	9.37722	0	0	2	2	0	2	2	2	2	2	2	2	0	0	0	0	0	0	0	0	2	0	2	0	2	2	0	2	0	2	2	0	0	0	2	2	0	0	0	2	2	0	2	2	NA	2
CH33	15.6175	4.79522	-1.6939	2	0	2	2	0	0	0	0	0	0	2	2	2	2	0	2	0	0	2	2	0	0	2	2	2	2	0	0	2	2	NA	0	0	0	2	2	2	2	0	2	0	2	2	0	2	0
CH34	26.7775	6.62391	9.184	2	2	0	0	0	2	2	0	NA	2	0	0	0	2	2	0	NA	2	0	0	0	0	2	2	0	NA	0	2	0	0	NA	2	2	2	0	0	2	0	NA	0	2	0	0	NA	0	2
CH35	-15.4363	-6.39009	-11.6315	2	0	0	0	0	0	0	0	0	2	0	0	0	2	2	2	0	2	2	0	2	2	0	2	2	2	0	2	0	2	0	2	2	2	2	0	2	0	2	2	2	NA	0	2	2	0
CH36	15.6175	0.692385	-8.4044	NA	0	0	2	NA	NA	0	NA	2	NA	NA	2	0	NA	2	2	0	NA	2	NA	NA	NA	NA	0	2	NA	NA	2	NA	2	2	2	NA	2	0	2	2	2	2	0	NA	2	2	NA	0	0
CH37	7.85407	-1.55567	-0.291801	2	2	0	0	0	0	0	0	2	2	0	0	2	2	2	2	0	2	2	0	0	0	0	0	2	0	0	2	0	2	0	2	0	2	0	0	0	2	2	0	2	2	2	0	2	0
CH38	1.54626	0.293579	-1.17014	0	2	0	2	0	0	0	2	0	0	2	2	2	0	0	2	2	0	2	0	0	0	0	0	0	0	0	0	2	2	2	0	0	0	2	2	2	2	2	0	0	2	0	2	0	0
CH39	17.5584	11.536	5.16885	2	2	2	0	2	2	0	0	2	0	2	0	0	2	2	0	2	2	2	0	0	2	0	2	0	2	2	0	2	0	0	0	0	2	2	0	2	0	0	2	0	2	0	2	2	2
CH40	11.2506	2.18574	6.96503	2	2	2	2	2	0	0	0	2	0	2	2	2	2	0	0	2	0	2	0	0	0	0	2	0	0	0	0	2	0	0	2	0	2	2	2	2	2	0	2	0	0	0	2	0	2
CH41	-2.82068	-0.870672	-6.90534	2	0	0	0	2	2	2	0	2	0	2	0	0	2	0	0	2	0	0	2	0	NA	0	NA	0	0	0	2	2	0	NA	2	0	0	2	0	0	2	2	2	NA	0	0	2	0	2
CH42	3.48712	-3.20335	3.93543	2	0	2	0	0	0	0	0	2	2	0	0	0	2	2	0	2	2	2	2	2	2	2	2	2	0	2	0	0	0	2	0	0	0	0	0	2	0	0	2	2	2	0	0	2	2
CH43	3.48712	-0.331306	-0.222603	2	2	0	0	0	2	0	0	2	0	2	0	0	2	0	2	2	0	2	0	0	2	2	0	0	0	0	0	2	2	2	2	0	0	2	0	2	2	2	0	0	2	2	0	0	0
CH44	-4.76155	3.44426	9.19868	2	2	2	2	2	2	0	0	0	2	2	2	0	2	2	0	2	0	2	2	0	0	2	0	2	0	2	2	0	0	2	0	0	2	2	2	2	0	0	2	2	2	0	0	2	NA
CH45	-0.394603	-2.44945	0.281868	0	2	2	0	2	0	2	2	2	2	0	0	0	0	0	2	0	0	0	2	2	0	2	2	0	2	2	2	0	2	2	0	2	2	0	0	0	2	0	0	2	0	0	0	0	0
CH46	-13.9807	-3.64132	-3.67972	0	0	2	0	0	0	0	2	2	0	2	0	0	0	0	0	2	0	2	2	2	0	0	2	2	0	0	2	2	0	2	0	0	0	2	0	0	2	0	0	0	NA	0	2	0	2
CH47	-17.3772	-2.10693	-2.25437	0	0	0	2	2	0	2	2	2	0	2	2	0	0	0	2	0	0	0	0	2	0	0	0	0	0	0	2	2	2	2	2	2	2	2	2	2	2	2	2	0	0	2	2	2	0
CH48	19.014	-3.20793	0.156552	0	0	2	0	2	0	0	2	0	2	0	0	2	0	0	0	2	0	2	2	2	2	2	0	0	2	2	2	0	0	0	0	2	0	2	0	2	0	0	0	2	2	0	0	2	2
CH49	-1.85025	4.03327	-4.80827	0	0	0	0	2	0	0	2	0	2	2	0	0	0	2	2	2	2	2	2	0	2	0	2	2	0	2	2	0	2	2	2	0	2	2	2	2	0	2	2	2	2	2	0	2	0
CH51	-3.79112	-0.163593	-5.02996	2	0	0	2	2	2	0	0	2	2	2	2	2	2	2	2	0	2	2	2	2	0	0	2	0	2	0	2	0	2	2	2	0	2	0	2	0	0	2	0	2	2	2	0	0	0
CH52	16.588	2.41149	-8.6617	2	0	0	2	0	2	0	0	2	0	2	NA	0	2	2	0	2	2	2	2	0	2	2	2	0	NA	2	0	2	0	0	2	0	0	2	NA	0	2	2	0	0	2	NA	2	2	2
CH53	-7.67284	0.843445	9.91969	0	0	0	0	2	0	0	2	2	0	0	0	0	0	0	2	0	0	2	2	2	2	2	2	2	2	2	0	2	0	0	2	2	2	2	0	2	2	2	2	0	2	2	0	0	0
CH54	20.4697	4.58812	8.49908	2	0	0	2	0	2	0	0	0	2	2	2	2	2	2	0	2	2	2	0	0	2	0	0	2	0	2	0	0	0	NA	2	2	0	2	2	2	0	2	0	2	2	2	2	0	2
CH55	3.97234	-3.74729	-4.75807	2	2	0	0	0	2	0	0	2	0	2	0	0	2	0	2	2	0	2	0	0	2	2	0	0	0	0	0	2	2	2	2	0	0	2	0	2	2	2	0	0	2	2	0	0	0
CH56	2.03148	-1.34854	-5.97872	2	2	0	0	0	2	0	0	2	0	2	0	0	2	0	2	2	0	2	0	0	2	2	0	0	0	0	0	2	2	2	2	0	0	2	0	2	2	2	0	NA	2	2	0	0	0
CH57	3.48712	-10.2214	-1.98909	2	2	0	0	0	2	0	0	2	0	2	0	0	2	0	2	2	0	2	0	0	2	2	0	0	0	0	0	2	2	2	2	NA	0	2	0	2	2	2	0	0	2	2	0	0	0
CH58	-4.76155	5.07529	14.0429	0	2	0	2	2	2	0	2	0	2	0	NA	0	NA	2	0	2	0	2	2	0	2	0	2	NA	0	2	0	0	0	0	2	2	0	NA	2	0	0	2	0	2	2	2	2	0	2
CH59	8.33928	-1.38272	6.30681	0	2	2	0	2	0	0	2	0	0	0	0	2	0	0	0	0	0	2	0	2	0	2	0	0	0	2	2	2	0	2	0	2	2	0	0	2	2	0	0	0	2	2	0	2	2
CH60	-15.9215	-2.30898	-1.21493	0	0	2	2	2	2	2	2	2	2	2	2	2	0	0	2	0	0	0	2	2	0	2	NA	2	0	2	2	0	2	2	0	0	2	NA	2	2	2	0	0	2	0	2	0	0	0
CH61	8.8245	-1.14757	-4.53158	2	2	2	2	2	2	0	0	0	2	2	2	0	2	2	0	2	0	2	2	0	0	2	0	2	0	2	2	0	0	2	0	0	2	2	2	2	0	0	2	2	2	0	0	2	2
CH62	23.8662	6.42427	-3.24184	2	2	2	2	0	2	0	0	2	2	2	2	2	2	2	2	0	2	2	0	0	0	0	2	2	2	0	2	0	2	2	0	NA	2	0	2	0	0	0	2	2	2	2	2	2	0
CH63	-2.82068	3.189	-4.91592	0	0	NA	0	2	0	2	2	2	2	2	0	0	0	2	0	0	2	0	2	0	2	2	2	NA	0	2	0	0	0	2	2	NA	2	0	0	0	0	2	0	2	0	NA	2	2	2
CH64	-16.4067	-3.54052	-8.91741	NA	0	0	2	2	0	2	2	2	0	2	NA	0	0	0	2	0	0	0	0	2	0	0	0	NA	0	0	2	2	NA	2	2	2	2	2	2	2	2	2	2	0	0	2	2	2	NA
CH65	5.42799	2.4723	-5.45804	0	0	0	0	0	0	2	2	0	0	0	0	0	0	0	NA	0	0	0	2	2	2	0	0	0	0	2	0	2	2	2	2	2	2	2	0	0	2	2	2	0	0	0	0	2	0
CH66	14.1619	3.5886	3.59356	2	2	2	0	0	0	0	0	2	2	2	0	2	2	0	0	0	0	2	2	2	2	0	0	0	0	2	2	0	0	0	0	0	0	0	0	2	0	0	0	2	2	0	2	0	2
CH67	-10.5841	-4.02419	6.56552	2	0	2	2	2	0	0	0	0	2	0	2	2	2	0	2	0	0	2	2	2	0	2	0	2	0	2	2	0	2	2	0	2	2	0	2	NA	0	0	2	2	NA	2	0	0	0
CH68	0.575829	-1.78693	-0.706786	2	0	2	0	0	0	2	0	2	2	2	0	0	2	0	0	2	0	0	0	2	2	2	0	0	0	0	2	0	0	0	0	0	0	0	0	0	2	0	0	2	0	0	0	2	2
CH69	13.6767	4.84356	7.88246	2	0	0	2	0	0	0	0	2	2	0	2	0	2	2	2	2	0	2	2	2	0	2	0	2	0	2	2	0	2	2	2	2	2	2	2	2	2	2	0	2	2	2	2	0	0
CH70	-2.82068	-7.04769	-2.32797	NA	0	2	2	2	0	0	2	2	2	0	2	2	NA	2	2	2	2	2	2	NA	2	0	0	2	2	2	0	0	2	2	0	2	0	0	2	2	0	0	2	2	2	0	0	0	0
CH71	-12.525	-7.56066	-5.46726	2	0	2	0	2	0	0	0	2	2	0	0	2	2	2	2	0	2	2	0	0	2	2	NA	2	2	0	2	0	0	0	0	NA	0	0	0	2	0	0	0	2	2	0	2	0	0
CH72	-3.79112	-4.3935	-0.889534	0	2	0	2	0	2	2	2	0	2	2	2	0	0	0	0	0	2	0	2	2	0	2	2	2	2	2	2	0	2	2	2	2	0	NA	2	0	0	2	0	2	0	2	0	0	2
CH73	13.1914	3.88651	4.22153	2	0	2	0	2	2	0	0	0	2	0	0	0	2	2	0	2	2	2	2	0	2	0	2	0	2	2	2	0	0	2	0	2	2	0	0	0	2	0	2	2	2	0	2	2	2
CH74	-16.4067	-7.26039	1.35793	2	2	0	2	0	2	2	0	0	2	2	2	2	2	2	0	0	2	0	2	2	2	0	2	2	2	NA	2	0	0	0	2	0	0	2	2	0	0	2	2	2	0	2	0	2	2
CH75	-2.82068	-6.39009	-4.29592	2	2	2	0	0	2	0	0	2	0	2	0	0	2	0	2	2	0	2	2	2	2	2	2	2	2	2	0	2	2	0	0	0	0	2	0	2	2	0	0	0	2	0	0	0	0
CH76	13.6767	4.8526	5.4548	0	2	2	2	2	2	0	2	2	2	0	2	0	0	2	2	0	2	2	2	0	0	2	0	2	0	2	0	0	2	0	0	2	2	0	2	2	2	0	0	2	2	0	0	2	0
CH77	-16.8919	-2.66372	-4.28649	0	0	0	0	2	0	2	2	0	0	0	0	2	0	2	2	2	2	0	0	2	2	0	0	0	2	0	0	2	0	2	2	2	2	0	0	2	2	2	2	0	0	0	0	0	0
CH78	19.9845	-5.8333	-0.607876	2	2	0	0	2	0	0	0	0	0	0	0	0	2	2	0	0	2	2	2	0	0	2	0	0	2	2	0	2	2	0	2	2	2	0	0	2	2	2	0	0	2	2	2	0	2
CH79	15.1323	8.46347	10.023	0	0	2	2	0	2	0	2	2	2	0	2	0	0	0	2	2	0	2	2	2	0	2	0	2	2	2	2	0	2	2	0	2	2	2	2	0	0	0	2	2	2	2	2	2	0
CH80	-17.3772	-6.8037	-3.70638	0	2	0	0	2	2	0	2	2	0	2	0	0	0	0	2	2	0	2	NA	0	0	0	2	2	0	NA	0	2	2	0	2	0	0	0	0	0	2	2	0	0	2	2	0	2	0
CH81	-16.8919	-9.23967	-6.89891	0	2	0	0	2	2	0	2	2	0	2	0	0	0	0	2	2	0	2	0	0	0	0	2	2	0	2	0	2	2	0	2	0	0	0	0	0	2	2	0	0	NA	2	0	2	0
CH82	-7.18763	-0.823051	1.1978	0	2	2	2	0	2	0	2	2	0	2	2	0	0	0	2	2	0	2	2	0	2	2	2	0	2	0	0	2	2	2	0	0	2	2	2	2	2	0	0	0	2	2	0	0	0
CH83	13.6767	-8.06784	-0.291801	2	2	2	2	0	0	2	0	0	0	0	2	2	2	2	0	0	2	0	2	0	0	2	0	0	2	2	2	2	2	NA	0	NA	0	2	2	2	2	0	2	0	NA	0	0	2	2
CH84	3.97234	3.17028	1.77614	0	2	2	2	0	2	2	2	0	0	0	2	2	0	2	0	2	2	0	2	0	0	2	2	2	2	2	2	2	0	2	0	2	2	0	2	2	2	0	0	0	0	0	2	0	2
CH85	1.54626	0.896052	-0.804225	0	2	0	2	0	2	2	2	2	2	2	2	2	0	0	0	2	0	0	2	0	2	2	0	2	0	0	2	0	0	0	2	0	0	2	2	0	0	2	2	2	0	2	2	0	2
CH86	-17.3772	-3.97891	-6.61609	2	2	0	2	2	2	0	0	0	2	0	2	2	2	2	0	0	2	2	0	2	0	2	2	2	0	0	0	0	0	0	2	2	2	2	2	0	0	2	0	2	2	2	0	2	2
CH87	5.42799	1.93944	-6.60666	2	0	0	0	0	0	2	0	0	2	2	0	0	2	2	0	2	2	0	0	0	2	2	0	2	0	2	0	0	0	2	2	2	NA	0	0	2	0	2	0	2	0	0	2	2	2
CH88	3.00191	-2.29706	-0.403608	0	0	2	2	2	2	2	2	0	0	2	2	2	0	2	0	0	2	0	2	0	2	0	0	0	2	0	0	2	2	0	0	0	0	0	2	2	2	0	2	0	0	0	0	0	2
CH89	-12.525	-2.22533	-3.70638	2	NA	2	NA	0	0	NA	NA	0	0	NA	0	2	2	2	0	0	2	0	NA	2	0	NA	2	NA	NA	2	2	2	0	NA	0	2	2	2	2	0	2	0	NA	0	NA	0	0	2	NA
CH90	-2.82068	4.33805	7.79269	0	2	2	2	2	2	0	2	2	2	0	2	2	0	0	0	2	0	2	0	2	0	2	0	0	2	0	2	0	0	0	0	2	2	2	2	0	0	0	0	2	NA	2	2	2	2
CH91	1.54626	-0.925546	-1.83757	2	2	2	2	0	0	0	0	2	0	2	2	2	2	2	2	0	2	2	0	2	0	0	0	0	0	0	2	2	2	2	0	2	2	NA	2	0	2	0	2	0	2	2	2	2	0
CH93	-1.36504	0.367097	-0.208187	2	0	2	0	0	0	0	0	2	0	2	0	0	2	0	0	0	0	2	2	0	0	0	0	2	0	2	0	2	0	2	0	0	0	2	0	0	0	0	2	0	NA	0	2	0	2
CH94	-15.9215	-6.71009	1.842	0	0	2	2	2	0	0	2	0	2	0	2	2	0	0	2	2	0	2	0	2	2	0	0	0	0	0	2	0	2	0	0	2	2	2	2	0	0	0	0	2	2	0	2	0	0
CH95	8.8245	11.7972	5.70718	0	2	0	2	2	2	0	2	2	0	0	2	0	0	2	2	2	2	2	0	0	2	2	2	2	0	0	2	2	2	0	2	2	2	0	2	2	2	2	2	0	2	0	0	0	0
CH96	-1.36504	3.62405	-0.11859	2	2	0	0	0	0	2	0	0	0	2	0	0	2	0	2	2	0	0	0	2	0	0	0	2	0	0	0	2	2	0	2	0	0	2	0	2	2	2	2	0	0	2	0	2	0
CH97	7.36885	2.57944	0.188452	2	2	0	2	0	2	2	0	0	0	0	2	2	2	2	0	2	2	2	0	2	0	2	2	2	2	2	0	2	0	0	2	2	2	2	2	0	2	2	2	0	2	0	0	2	0
CH98	-16.4067	-6.31626	-9.83228	2	0	0	2	2	2	2	0	0	0	0	2	0	2	2	2	0	2	0	0	0	0	0	2	0	0	2	2	2	0	NA	2	NA	0	2	2	0	2	2	0	0	0	2	2	2	0
CH99	-7.67284	2.4482	6.83903	NA	2	NA	2	NA	2	NA	0	2	2	2	2	NA	2	2	NA	NA	0	0	2	2	0	NA	0	NA	2	NA	2	NA	2	0	0	NA	0	0	2	0	0	0	0	2	0	NA	2	2	NA
CH100	-8.15806	3.47382	7.08973	0	2	2	0	NA	0	0	NA	0	0	2	0	2	NA	NA	0	2	0	2	2	2	2	0	0	2	2	2	2	2	NA	NA	0	0	2	0	0	2	2	0	0	0	2	2	0	0	2
CH101	7.36885	0.0282719	1.90439	0	2	0	2	0	2	0	2	2	0	2	2	2	0	0	2	0	0	2	0	0	0	2	0	0	2	0	2	2	2	0	2	0	2	2	2	0	2	2	0	0	0	2	2	2	0
CH102	3.48712	-0.294096	-8.53784	0	2	0	2	0	0	0	2	0	0	2	2	0	0	0	2	2	2	2	0	2	2	2	0	2	0	0	0	2	2	2	2	0	2	NA	2	2	2	2	0	0	2	0	0	NA	0
CH103	1.06104	5.32074	4.84854	2	2	0	2	0	2	0	0	2	0	2	2	0	2	0	2	2	2	2	2	0	0	0	2	0	2	2	0	2	0	0	2	2	0	0	2	2	2	2	0	0	2	2	0	2	0
CH104	-18.3476	-2.2238	-1.43584	2	2	0	2	2	0	0	0	0	2	2	2	2	2	0	2	0	0	2	2	0	2	2	0	2	2	2	2	0	2	2	2	2	2	0	2	2	0	2	2	2	2	0	0	0	0
CH105	3.00191	-7.76151	0.895276	2	2	0	0	2	0	0	0	0	0	2	0	0	2	NA	2	0	NA	2	0	0	2	0	0	2	0	0	2	2	0	NA	2	0	2	0	0	0	2	2	2	0	2	2	0	0	NA
CH106	-3.79112	4.90741	3.21856	0	2	2	2	0	2	2	2	0	0	2	2	2	0	2	2	0	2	0	0	0	2	2	0	2	2	2	2	2	2	0	0	0	0	2	2	0	2	0	2	0	0	2	0	2	0
CH107	-14.4659	1.74348	-0.707432	2	2	0	2	0	2	0	0	0	2	2	2	0	2	2	0	0	2	2	0	0	2	2	2	2	0	2	0	0	0	0	2	0	0	0	2	0	0	2	2	2	2	2	2	2	2
CH108	0.0906126	0.387849	-2.39897	0	0	2	2	2	2	2	2	0	0	2	2	0	0	2	2	2	2	0	2	0	2	0	2	NA	0	0	2	2	2	2	0	0	0	0	2	0	2	0	0	0	0	0	2	2	0
CH109	-1.36504	9.36694	2.25048	0	2	2	2	0	2	0	2	2	2	2	2	2	0	0	0	2	0	2	2	0	2	2	2	0	2	2	0	0	0	NA	0	0	2	0	2	2	0	0	0	2	2	2	0	2	2
CH110	-4.76155	-1.3816	1.3661	2	2	2	2	2	2	2	0	NA	0	0	2	2	2	0	2	NA	0	0	2	2	NA	0	0	0	NA	0	NA	2	0	0	0	0	0	NA	2	2	0	0	2	0	0	0	NA	0	0
CH111	-0.879819	0.44597	1.08724	2	0	2	2	2	2	2	0	2	2	0	2	0	2	2	0	2	2	0	0	0	0	0	2	0	0	2	2	0	0	NA	0	2	0	0	2	0	0	0	0	2	0	2	0	2	2
CH112	-15.9215	-6.08455	-0.290631	0	2	2	2	2	NA	2	2	0	2	2	2	0	0	0	0	0	0	0	0	0	0	2	0	0	2	2	NA	0	0	2	NA	0	2	0	2	0	0	0	0	2	0	0	2	0	2
CH113	-0.394603	2.18574	0.281868	0	0	0	0	2	0	2	2	0	0	0	0	0	0	2	2	0	2	0	2	2	2	2	0	2	0	0	2	2	2	0	2	2	0	2	0	0	2	2	2	0	0	0	0	2	0
CH114	16.1027	-3.54052	0.129632	2	2	2	2	0	2	0	0	2	2	2	2	0	2	0	0	0	0	2	2	2	2	0	2	2	2	0	0	0	0	0	0	0	2	2	2	0	0	0	0	2	2	2	0	0	2
CH115	11.2506	-1.9494	-6.65941	2	2	2	0	2	2	2	0	2	0	0	0	2	2	0	2	0	0	0	2	2	0	2	0	2	2	0	0	0	2	2	0	2	2	0	0	0	2	0	2	2	0	0	2	2	NA
CH116	6.88364	-1.53511	-2.72794	2	0	0	0	0	0	2	0	0	2	2	0	0	2	2	0	2	2	0	NA	2	2	0	2	0	0	0	2	0	0	NA	2	0	0	2	0	2	2	2	2	2	0	0	0	0	2
CH117	1.54626	0.403118	-2.10686	2	2	0	2	2	2	2	0	2	2	2	2	0	2	2	0	2	2	0	0	0	2	0	0	0	2	0	2	0	0	2	2	0	0	0	2	2	0	2	2	2	0	0	0	2	2
CH118	8.8245	4.17342	-1.72042	0	0	2	2	0	2	2	2	2	2	0	2	0	0	2	0	NA	2	0	0	2	0	2	2	2	0	0	2	0	0	2	0	2	0	2	2	2	0	0	0	2	0	0	0	2	2
CH119	2.03148	6.30689	8.26376	0	2	2	2	0	2	0	2	0	0	0	2	0	0	2	0	NA	0	2	2	0	2	0	0	2	2	2	2	2	0	2	0	2	0	2	2	2	2	0	2	0	2	2	2	0	2
CH120	2.03148	-0.234946	0.953781	0	0	0	2	2	2	2	2	0	0	0	2	2	0	0	2	2	0	0	2	0	0	0	2	0	NA	2	0	2	2	2	2	2	0	0	2	2	2	2	0	0	0	2	0	2	0
CH121	-13.4954	-1.78693	-1.9874	0	0	0	0	0	0	2	2	0	0	2	0	2	0	0	0	0	0	0	2	2	0	0	0	0	0	2	0	2	0	NA	2	0	2	0	0	0	2	2	0	0	0	2	2	2	2
CH122	-16.8919	-8.54508	-10.3008	NA	2	NA	0	NA	NA	2	0	NA	2	2	0	2	2	0	NA	0	NA	0	NA	2	NA	NA	2	NA	NA	NA	0	NA	2	2	2	2	NA	2	NA	NA	0	2	0	2	0	NA	NA	NA	NA
CH123	-17.3772	-13.3393	-12.0919	0	2	0	0	0	0	0	2	0	0	NA	0	2	0	NA	2	0	0	2	2	2	2	2	0	0	0	2	2	2	0	2	2	NA	2	2	0	0	2	2	2	0	NA	0	0	0	0
CH124	8.8245	-0.233285	-4.10167	0	0	2	2	2	0	0	NA	2	0	0	2	2	0	NA	0	0	0	2	0	2	2	0	NA	0	0	0	2	2	2	2	0	2	0	NA	2	0	2	NA	0	0	2	2	0	0	2
CH125	10.2801	-4.99388	-1.99043	0	0	2	0	0	0	0	2	2	2	0	0	0	0	2	2	0	2	2	0	0	2	0	0	2	2	0	2	0	2	2	0	2	0	0	0	2	0	0	2	2	2	0	0	0	0
CH126	7.36885	3.44426	5.43016	0	0	2	2	2	2	0	2	2	2	0	2	2	0	2	0	0	2	2	0	0	0	0	2	2	0	0	0	0	2	0	0	2	2	0	2	2	0	0	2	2	NA	2	0	0	2
CH127	1.54626	1.28679	4.23216	0	0	2	0	2	2	0	2	2	2	0	0	2	0	2	0	0	2	2	2	0	2	2	0	2	0	2	0	0	0	NA	0	2	2	2	0	2	0	0	2	2	NA	0	2	0	NA
CH128	19.014	7.15116	5.90123	0	0	0	0	2	0	2	2	2	2	0	0	2	0	0	0	2	0	0	0	0	2	0	2	0	0	0	2	0	0	2	2	2	0	0	0	0	0	2	0	2	0	0	2	2	2
CH129	8.8245	-1.21581	6.04878	2	0	0	0	2	NA	2	0	0	2	0	0	0	2	0	0	2	0	0	0	2	0	2	NA	2	0	2	2	0	0	0	2	2	2	2	0	0	NA	2	NA	2	NA	0	0	2	2
CH130	15.6175	8.06876	4.01697	0	2	2	2	2	0	0	2	0	0	0	2	0	0	0	0	2	0	2	0	0	0	2	2	0	2	0	0	2	2	0	0	2	0	0	2	2	2	0	0	0	2	2	0	2	2
CH131	-13.9807	-7.70264	-11.6903	2	2	0	2	2	2	2	0	0	0	2	2	0	2	2	2	2	2	0	2	2	0	2	0	NA	0	2	0	2	2	0	2	2	0	2	2	0	2	2	0	0	0	0	2	2	0
CH132	-7.18763	1.96342	6.62804	0	2	0	0	0	0	2	2	0	2	0	0	2	0	2	0	0	2	0	2	0	0	2	2	2	2	2	0	0	0	2	2	2	0	2	0	2	0	2	2	2	0	2	0	2	2
CH133	-12.525	0.405049	9.35892	0	2	2	0	2	0	2	2	0	2	0	0	0	0	0	0	0	0	0	0	2	2	2	2	2	0	0	0	0	0	2	0	2	0	0	0	0	2	0	2	2	0	2	0	2	2
CH134	-8.64328	5.24931	8.02102	2	2	2	0	2	0	2	0	2	0	2	0	0	2	0	0	0	0	0	0	2	0	2	2	2	0	2	0	2	0	0	0	0	0	2	0	0	0	0	0	0	0	0	2	0	2
CH135	-12.525	-4.41731	-0.589302	2	2	0	2	2	2	0	2	2	0	2	2	2	2	2	2	0	2	2	0	0	2	2	2	0	0	0	0	2	2	0	2	0	2	0	2	2	2	2	2	0	2	0	2	0	0
CH137	3.00191	-0.608206	2.55287	2	2	2	0	2	0	0	0	0	0	0	0	0	2	2	2	2	2	2	2	0	2	0	2	0	2	2	2	2	2	2	0	2	2	2	0	0	0	0	2	0	NA	2	2	0	0
CH138	-14.9511	-1.05046	-4.7906	2	0	2	2	2	0	2	0	2	2	2	2	2	2	0	0	2	0	0	0	0	2	2	2	2	2	2	0	0	0	2	0	NA	0	2	2	2	0	0	2	2	NA	2	0	2	2
CH139	18.5288	8.22999	2.58949	2	2	0	2	2	2	0	0	0	0	2	2	0	2	0	2	2	0	2	0	2	2	0	2	2	2	0	0	2	2	2	2	2	2	2	2	2	2	2	0	0	2	2	2	2	0
CH140	-2.82068	4.97968	5.27929	0	0	NA	0	NA	NA	2	2	NA	2	0	0	2	NA	2	NA	2	NA	0	NA	NA	NA	NA	0	NA	0	NA	0	NA	2	0	NA	NA	0	0	NA	NA	NA	NA	NA	2	NA	NA	2	2	NA
CH141	13.6767	-0.76224	3.44733	0	NA	2	0	0	0	2	2	0	2	0	NA	0	0	2	0	2	2	0	2	2	0	2	NA	0	0	0	0	0	0	2	2	2	2	2	0	2	2	0	0	2	0	0	0	2	2
CH142	1.06104	-7.34307	-10.5142	2	0	2	0	0	2	0	0	0	0	NA	0	2	2	2	2	0	2	2	2	2	2	2	0	0	0	2	0	2	2	0	0	NA	2	2	0	0	2	0	2	0	2	2	0	NA	0
CH143	-8.15806	-0.06884	0.403052	2	0	0	2	0	0	0	0	0	2	NA	2	2	2	2	0	2	2	2	2	0	2	0	0	NA	0	2	0	0	NA	NA	2	2	NA	2	2	2	0	2	2	2	2	2	2	0	2
CH144	-8.15806	-0.011202	2.75251	2	0	0	2	2	2	2	0	0	0	2	2	2	2	0	2	0	0	0	2	0	0	0	2	2	2	2	0	2	2	0	2	0	0	2	2	0	0	2	2	0	0	2	0	2	0
CH145	-16.4067	-2.54533	4.58468	2	2	0	2	0	2	2	0	0	2	0	2	2	2	2	0	0	2	0	0	2	2	2	0	2	0	0	2	0	0	NA	NA	2	2	2	2	0	0	2	2	2	0	2	0	2	2
CH146	-8.64328	2.90489	6.97148	0	0	2	0	0	0	0	2	2	2	2	0	0	0	0	0	0	0	2	0	0	NA	2	0	0	2	0	0	0	0	NA	0	NA	2	NA	0	2	0	0	2	2	2	2	0	2	2
CH147	-15.9215	-7.39603	-2.75542	0	0	0	2	0	2	2	2	2	2	2	2	0	0	0	0	0	0	0	2	2	0	2	0	2	0	2	0	0	0	0	2	0	2	0	2	0	0	2	2	2	0	0	2	0	2
CH148	-17.3772	-7.02117	-6.6262	0	0	0	0	0	2	0	2	2	2	2	0	2	0	0	2	2	0	2	0	0	0	2	0	2	0	0	0	0	0	0	2	0	0	0	0	2	0	0	2	2	2	2	0	0	0
CH149	10.2801	-1.66853	5.38465	2	2	0	2	0	2	2	0	0	2	0	2	2	2	2	0	0	2	0	NA	2	2	2	0	2	0	0	2	0	0	0	2	2	2	2	2	0	0	2	2	2	0	2	0	2	2
CH150	8.33928	4.8653	-1.21493	0	0	0	2	2	2	2	2	2	2	0	2	0	0	2	0	2	2	0	0	0	2	0	2	2	2	0	0	0	0	0	2	2	0	2	2	0	2	2	0	2	0	2	0	0	2
CH151	-14.9511	-0.269552	-7.12639	2	2	0	2	2	NA	0	2	2	0	2	2	2	2	2	2	0	2	2	0	0	2	2	NA	NA	0	0	0	2	NA	0	2	0	2	0	2	2	2	2	2	0	2	0	2	0	0
CH152	13.1914	-2.22698	-6.8175	NA	NA	NA	NA	NA	2	0	NA	2	NA	0	2	2	NA	2	NA	NA	2	2	NA	0	NA	2	0	2	2	0	0	2	0	0	0	2	2	NA	2	NA	NA	0	2	NA	2	2	0	0	2
CH153	-17.3772	-5.41495	-0.811433	0	0	0	0	0	2	0	2	2	2	2	0	2	0	0	2	2	0	2	0	0	0	2	0	2	0	0	0	0	0	0	2	0	0	0	0	2	0	0	2	2	2	2	0	0	0
CH154	6.39842	5.4466	9.81615	0	0	2	0	2	0	0	2	2	2	2	0	0	0	0	0	0	0	2	2	2	0	2	0	2	2	0	0	0	0	NA	0	2	0	NA	0	0	0	0	NA	2	2	0	0	0	2
CH155	-14.9511	0.747427	-1.54611	0	2	0	2	0	0	0	2	2	2	2	2	2	0	2	0	0	2	2	0	0	2	2	0	2	2	0	0	0	0	2	2	0	2	2	2	0	0	2	2	2	2	2	0	0	2
CH156	3.00191	2.81685	-9.37956	0	2	2	2	NA	0	2	2	2	0	2	2	0	0	0	2	0	NA	0	2	2	NA	NA	0	0	0	2	2	2	NA	NA	0	0	0	NA	2	2	2	0	0	0	0	2	2	0	NA
CH157	10.2801	-5.98743	-7.99311	0	0	2	2	0	2	0	2	2	2	2	2	2	2	0	0	2	0	2	2	0	0	2	0	2	2	2	0	0	0	0	0	2	0	2	2	2	0	0	0	2	2	2	0	2	2
CH159	14.1619	3.70672	1.38748	0	0	2	2	0	2	2	2	2	2	2	2	2	0	0	2	2	0	0	0	2	2	2	0	0	0	0	0	0	2	2	0	2	0	2	2	0	0	0	0	2	0	2	2	2	0
CH160	-0.879819	-4.81762	-2.21021	2	0	NA	0	0	0	2	0	0	0	2	0	2	2	2	0	0	2	0	2	2	0	0	0	2	0	2	2	2	2	NA	2	2	0	0	0	0	2	0	2	0	0	0	2	2	2
CH161	-14.9511	-5.4625	-1.58694	2	2	0	0	2	0	2	0	2	2	2	0	2	2	2	0	0	0	0	2	0	0	2	2	NA	0	2	0	0	0	0	2	0	0	2	0	2	0	2	0	2	0	0	0	0	2
CH163	15.6175	5.51913	-1.43584	2	0	0	2	0	2	0	0	0	2	2	2	2	2	2	0	2	2	2	0	0	2	0	0	2	0	2	0	0	0	0	2	2	0	2	2	2	0	2	0	2	2	2	2	0	2
CH164	20.4697	8.2908	-5.19106	2	2	0	2	0	2	2	0	0	2	0	2	2	2	0	0	2	0	0	2	2	2	0	0	2	0	0	NA	0	0	0	2	2	0	NA	2	0	0	NA	2	2	0	2	NA	2	0
CH165	-13.4954	-4.50061	-3.80317	2	2	0	2	0	2	0	0	2	0	0	2	2	2	0	0	0	0	2	2	2	2	0	2	0	2	2	0	2	0	0	2	2	2	0	2	0	2	2	0	0	2	2	0	0	2
CH166	14.1619	-5.90476	5.93722	2	0	0	0	2	0	0	0	2	0	2	0	2	2	2	2	2	2	0	NA	2	2	2	0	2	0	0	2	2	0	NA	2	2	2	0	0	0	0	2	2	0	2	NA	2	0	NA
CH168	-2.82068	-1.68791	-3.86614	2	2	0	0	0	2	2	0	2	0	0	0	2	2	2	0	0	2	0	0	0	2	2	2	0	0	2	0	2	0	0	2	2	0	0	0	0	2	2	0	0	0	0	0	2	2
CH169	8.8245	11.355	2.34216	0	0	0	0	2	0	0	2	0	2	0	0	0	0	2	0	2	2	NA	0	0	2	2	NA	2	2	2	2	0	0	0	2	2	2	2	0	2	0	2	0	2	2	0	2	2	2
CH170	18.5288	5.05272	-0.9304	2	2	2	0	0	2	2	0	NA	2	0	0	0	2	NA	2	0	0	0	2	2	2	2	2	2	2	0	2	0	2	NA	0	NA	NA	0	0	0	0	0	2	2	0	2	0	2	0
CH171	-7.67284	-1.05046	5.5467	2	2	0	2	0	2	0	0	0	2	0	2	2	2	0	0	2	2	2	NA	2	2	2	0	2	NA	2	2	0	2	0	2	2	2	2	2	2	2	2	2	2	2	2	2	2	2
CH172	-8.64328	5.42193	8.90901	0	NA	0	NA	0	2	2	2	2	0	0	2	2	0	2	2	0	2	0	0	0	0	2	0	2	2	0	0	2	2	0	2	2	0	0	2	2	2	2	2	0	0	2	0	2	0
SA2	-21.6017	0.895017	-3.96254	2	2	0	2	2	2	2	0	2	2	2	2	2	2	0	2	2	2	0	2	2	2	0	0	2	2	0	0	0	2	2	2	2	0	0	2	2	0	2	2	2	0	0	0	0	2
SA3	-4.12047	3.6543	11.3128	2	2	0	0	0	2	2	0	0	2	2	0	0	2	0	2	2	0	0	2	0	2	2	0	2	0	2	2	0	2	2	2	2	2	2	0	2	0	2	2	2	0	0	2	0	2
SA4	-16.4046	-4.58939	-5.03149	2	2	2	0	0	2	2	0	2	2	0	0	0	2	0	2	2	0	0	0	2	0	0	0	2	2	0	0	0	2	2	0	0	0	0	0	0	0	0	0	2	0	0	0	2	2
SA5	-17.822	2.1286	6.06719	0	0	2	2	2	2	2	2	0	0	2	2	0	0	0	2	2	2	0	2	2	2	0	2	0	0	0	2	2	2	2	0	2	0	NA	2	0	2	0	0	0	0	0	NA	2	2
SA6	-16.4046	-7.68069	-7.66743	0	0	2	2	2	NA	0	2	0	0	2	2	0	0	2	0	2	2	2	0	2	0	NA	2	0	2	0	0	2	0	2	0	2	0	2	2	2	2	0	2	0	2	0	0	2	0
SA7	-15.9321	4.85694	-7.31164	2	0	0	0	2	0	2	0	2	2	0	0	0	2	0	2	2	2	0	2	0	0	0	2	2	2	0	2	0	2	0	2	0	0	NA	0	2	0	2	2	2	0	2	2	2	2
SA8	-13.5698	6.05769	-8.73158	0	0	2	0	0	2	0	2	2	2	0	0	2	0	2	2	0	0	2	0	0	2	0	2	NA	0	0	0	0	2	2	0	0	0	2	0	2	0	0	2	2	2	2	2	2	2
SA9	-19.7118	-2.53625	-7.25123	0	2	0	0	0	0	2	2	2	0	2	0	0	0	0	0	2	2	0	2	0	2	0	2	2	0	2	0	2	0	0	2	2	0	2	0	0	2	2	2	0	0	2	0	2	0
SA10	-14.9872	-3.72623	-4.47656	0	0	2	2	2	2	2	2	0	0	2	2	0	0	0	2	2	2	0	2	2	2	0	2	0	0	0	2	2	2	2	0	2	0	2	2	0	2	0	0	0	0	0	NA	2	2
SA11	7.69116	-6.73241	-4.13082	0	2	0	0	0	2	2	2	0	0	0	0	0	0	2	2	2	0	0	0	0	2	0	NA	0	0	2	2	2	NA	2	2	0	2	2	0	2	2	2	0	0	0	2	NA	2	2
SA12	-7.90019	-4.13475	-6.1555	0	0	2	2	2	2	2	2	0	0	2	2	0	0	0	2	2	2	0	2	2	2	0	2	0	0	0	2	2	2	2	0	2	0	2	2	NA	2	0	0	0	NA	0	NA	2	2
SA13	0.604182	-7.13533	-2.80138	0	0	2	0	0	0	2	2	0	0	0	0	2	0	2	2	2	0	0	2	2	2	NA	2	2	NA	0	2	2	0	0	0	0	2	NA	0	2	2	0	0	0	NA	0	0	0	2
SA15	49.2681	5.06987	0.301559	2	0	2	2	0	2	0	0	0	0	2	2	2	2	NA	2	0	2	2	0	2	0	0	2	2	2	0	2	2	2	2	0	2	2	0	2	2	2	0	0	0	2	NA	NA	0	2
SA16	-8.84512	-1.08235	2.15127	0	0	0	2	0	2	0	2	2	0	2	2	0	0	0	0	0	2	2	2	0	2	0	2	0	2	0	2	2	0	2	2	2	0	2	2	0	0	2	0	0	2	2	0	0	0
SA17	-20.6567	-1.46078	-0.482891	0	0	2	2	2	2	0	2	2	0	0	2	0	0	0	2	2	2	2	2	0	0	0	0	0	0	0	2	2	2	2	0	0	0	0	2	0	2	0	0	0	NA	0	0	0	2
SA20	46.9057	9.29937	-0.0849523	0	2	2	0	2	2	0	2	2	0	0	0	0	0	2	0	2	2	2	0	0	0	0	NA	2	0	2	2	2	0	0	0	0	2	NA	0	2	2	0	0	0	2	0	0	0	0
SA21	30.3695	-10.2877	-3.47521	NA	2	0	2	0	2	0	0	0	2	2	2	0	2	2	2	2	2	2	0	2	0	0	2	2	2	0	2	0	2	0	2	2	0	0	2	2	0	2	2	2	2	2	2	0	2
SA22	-13.5698	7.98287	9.39679	0	0	0	0	2	0	2	2	0	0	0	0	0	0	2	2	0	0	0	2	2	2	0	0	0	2	0	2	2	2	2	2	2	2	0	0	2	2	2	0	0	0	0	2	2	2
SA23	-16.877	3.41696	4.81858	0	2	0	2	0	2	2	2	0	0	2	2	0	2	0	2	2	0	0	0	2	0	0	2	2	0	0	2	2	2	2	2	2	0	0	2	0	2	2	2	0	0	0	0	2	2
SA24	10.9984	13.5328	19.0636	0	0	0	2	2	2	0	2	2	0	2	2	0	0	0	2	0	0	2	2	2	0	NA	NA	0	0	0	2	2	2	2	2	2	2	2	2	0	2	2	2	0	2	0	0	2	2
SA25	-16.4046	10.6471	-4.02861	0	2	0	2	0	NA	0	2	0	2	0	2	0	0	0	2	2	0	2	0	0	0	0	0	0	0	2	2	0	2	0	2	0	2	0	2	2	0	2	2	2	2	0	0	0	2
SA26	-0.813212	7.77111	2.41196	0	0	NA	2	2	2	0	2	2	0	2	2	0	0	0	2	0	0	2	2	2	0	2	2	0	0	0	2	2	2	2	2	2	2	2	2	0	2	2	2	0	2	NA	0	2	2
SA27	-16.877	-6.10815	-2.39555	0	2	0	0	2	2	2	2	0	2	2	0	2	0	2	2	0	2	0	0	2	2	2	0	2	0	0	2	0	2	2	2	2	0	2	0	0	0	2	0	2	0	2	NA	0	2
SA28	-14.9872	-1.96624	-4.32803	0	2	0	2	0	2	2	2	0	0	2	2	0	2	0	2	2	0	0	0	2	0	0	2	2	0	0	2	2	2	2	2	2	0	0	2	0	2	2	2	0	0	0	0	2	2
SA29	-21.6017	-3.24233	-3.03633	2	0	0	0	2	0	2	0	0	0	0	0	2	2	0	2	0	2	0	2	0	2	2	2	2	0	0	2	2	2	0	2	0	2	0	0	0	2	2	0	0	0	2	0	2	2
SA30	-18.7669	-3.26809	-1.56315	0	2	0	0	0	2	2	2	2	0	2	0	2	0	0	2	0	2	0	2	0	2	2	2	0	2	0	2	2	2	0	2	0	0	0	0	2	2	2	0	0	2	2	2	0	2
SA31	8.16362	8.02078	8.42565	0	2	0	0	0	0	2	2	2	0	2	0	0	0	0	0	2	2	0	2	2	0	0	0	2	0	0	2	2	2	2	2	0	0	2	0	2	2	2	2	0	0	2	0	2	0
SA32	-16.4046	-8.00398	-7.80616	0	2	NA	0	0	2	2	2	2	0	2	0	2	0	0	2	0	2	0	2	0	2	2	2	0	2	0	2	2	2	0	2	0	0	0	0	2	2	2	0	0	2	2	2	0	2
SA33	14.7781	-0.0390175	7.02455	2	0	2	0	2	0	0	0	2	0	2	0	0	2	0	0	2	2	2	0	0	2	2	NA	2	0	0	2	2	0	0	0	0	2	2	0	2	0	0	0	0	2	2	2	0	0
SA34	4.85637	-8.07867	3.84745	0	2	0	0	0	0	2	2	2	0	2	0	0	0	0	0	2	2	0	2	2	0	0	0	2	0	0	2	2	2	2	2	0	0	2	0	2	2	2	2	0	0	2	0	2	0
SA35	-6.01033	1.4359	6.88045	2	0	0	2	0	2	0	0	2	0	2	2	2	2	0	2	2	2	2	0	2	0	0	0	2	0	2	2	2	2	0	2	2	2	0	2	2	2	2	0	0	2	2	2	2	2
SA36	-21.6017	-0.378563	-4.57326	0	0	0	2	2	2	0	2	2	0	0	2	0	0	2	2	0	2	2	0	0	2	0	2	2	2	2	2	2	0	0	2	0	2	2	2	0	2	2	2	0	2	2	0	2	2
SA37	35.0941	-0.889951	0.42339	0	0	2	0	0	0	2	2	2	2	2	0	2	0	0	0	0	0	0	2	0	0	2	2	0	2	2	2	0	0	0	0	2	0	0	0	0	2	0	2	2	0	2	2	0	0
SA38	-18.7669	0.184565	4.31655	2	0	2	2	2	0	0	0	0	0	2	2	0	2	2	2	2	0	2	0	0	0	2	0	2	0	2	2	2	0	0	0	2	2	2	2	2	2	0	0	0	2	2	NA	0	2
SA39	-19.2393	-1.94556	2.82147	2	0	2	2	2	NA	0	0	0	NA	2	2	2	2	NA	0	0	2	2	2	2	2	2	2	0	2	0	2	NA	0	0	0	2	2	0	2	NA	0	NA	0	2	2	0	NA	0	0
SA40	-4.59293	-4.38052	-3.92162	2	0	2	0	2	0	0	0	2	0	2	0	0	2	0	0	2	2	2	0	0	2	2	2	2	0	0	2	2	0	0	0	0	2	2	0	2	0	0	0	0	2	2	2	0	0
SA41	-6.01033	-1.78604	-0.961103	0	0	0	2	0	0	2	2	0	0	2	2	0	0	0	2	0	0	0	2	2	0	2	2	2	0	0	0	2	2	0	2	2	2	0	2	2	2	2	0	0	0	0	0	2	2
SA42	-14.5147	5.80759	-5.30896	0	2	2	0	0	0	0	2	2	2	2	0	0	0	0	2	2	0	2	2	0	0	2	0	0	0	0	0	0	0	0	0	2	0	2	0	0	0	0	0	2	2	2	2	2	2
SA43	47.3782	1.61966	5.7359	0	2	2	2	0	2	2	2	0	2	0	2	0	0	2	2	2	0	0	2	2	0	0	0	2	0	0	0	0	2	2	0	0	0	0	2	0	0	0	2	2	2	2	0	0	2
SA44	44.5434	3.88695	-1.45535	0	2	0	2	2	0	2	2	0	2	2	2	0	0	0	0	2	2	0	2	0	2	0	0	2	0	0	0	0	0	2	2	2	2	0	2	0	0	2	0	2	0	2	0	2	0
SA45	39.8188	-11.2469	-6.66731	0	2	0	2	2	0	2	2	0	2	2	2	0	0	0	0	2	2	0	2	0	2	0	0	2	0	0	0	0	0	2	2	2	2	0	2	0	0	2	0	2	0	2	0	2	0
SA46	41.2362	-1.00147	-1.07358	0	0	0	2	2	2	2	2	2	0	0	2	2	0	0	0	0	2	0	2	2	2	0	2	0	0	0	2	2	0	0	2	0	0	0	2	0	2	2	0	0	0	2	NA	0	0
SA47	-8.37265	5.17679	13.0939	0	2	0	0	2	0	0	2	0	0	0	0	2	0	0	2	0	2	2	2	0	0	0	2	2	2	2	0	2	2	0	2	2	0	2	0	2	2	2	0	0	NA	0	2	2	2
SA48	-17.822	0.368116	8.63254	2	0	0	0	2	0	2	0	2	0	2	0	2	2	2	2	2	2	0	2	0	0	0	0	0	0	0	2	2	2	0	2	2	0	2	0	2	2	2	2	0	0	0	0	2	2
SA49	-3.17554	-2.33764	5.92845	0	2	0	0	0	0	2	2	0	0	0	0	0	0	0	0	0	NA	0	0	2	2	2	0	0	2	2	2	2	0	2	2	0	0	0	0	2	0	2	0	0	0	0	0	2	0
SA50	-18.7669	-9.15013	-7.37382	2	2	NA	0	2	0	0	0	2	0	0	0	0	2	0	0	0	2	2	0	0	2	0	2	0	2	0	2	2	0	2	2	NA	NA	0	0	0	2	2	0	0	2	2	NA	0	0
SA51	51.6304	-1.26027	1.07278	0	2	2	0	0	0	0	2	0	0	0	0	0	0	2	0	2	2	2	2	2	0	2	0	2	NA	0	0	2	0	0	0	2	0	2	0	0	2	0	2	0	NA	2	0	0	0
SA52	2.02158	-4.67905	-2.31813	0	0	0	2	0	0	2	2	0	0	2	2	0	0	0	2	0	0	0	2	2	0	2	2	2	0	0	0	2	2	0	2	2	2	0	2	2	2	2	0	0	0	0	0	2	2
SA53	-20.1843	-0.391295	2.19213	0	0	0	0	2	0	0	2	2	0	0	0	2	0	2	2	2	2	2	2	0	0	0	0	0	0	0	0	2	0	0	2	0	2	2	0	2	2	2	2	0	2	2	0	0	2
SA54	2.96651	9.315	1.88537	2	0	2	2	0	2	2	0	0	0	2	2	2	2	0	2	0	2	0	2	2	0	2	2	0	0	0	0	2	2	0	0	0	0	2	2	0	2	0	0	0	0	0	0	0	2
SA55	-23.0191	-13.3898	-6.28374	2	0	0	2	0	0	2	0	2	0	0	2	0	2	0	2	0	2	0	0	2	2	0	0	2	2	0	2	2	2	0	2	2	2	NA	2	2	2	2	0	0	0	2	0	2	2
SA56	-18.7669	-12.4525	-8.69995	2	0	2	2	0	2	0	0	2	2	0	2	0	2	2	2	0	0	2	0	0	2	0	2	2	2	0	0	0	0	0	0	0	0	2	2	2	0	0	2	2	2	0	0	0	0
SA57	-16.877	1.21399	0.259159	0	2	2	0	2	0	2	2	2	0	0	0	2	0	0	0	NA	0	0	2	0	2	0	0	0	0	0	0	2	0	0	0	0	2	2	0	2	0	0	0	0	0	2	0	0	0
SA58	-7.90019	-4.67407	-7.31164	NA	2	0	0	0	2	0	0	2	0	2	0	0	2	0	2	2	2	2	0	0	2	2	0	2	2	0	2	2	0	2	2	2	2	0	0	0	2	2	0	0	NA	0	2	NA	2
SA59	31.3144	-5.1626	-5.82591	2	2	0	0	0	0	2	0	2	0	0	0	2	2	2	0	2	2	0	0	0	0	0	2	2	2	0	2	2	0	0	2	0	2	2	0	0	2	2	0	0	0	2	2	2	0
SA60	37.9289	-9.93473	0.545222	NA	2	0	0	0	0	NA	0	2	0	0	0	NA	2	2	0	2	2	0	0	0	0	0	NA	2	2	NA	2	2	0	0	2	0	2	2	0	0	2	2	0	0	NA	2	2	2	0
SA61	-20.6567	4.66395	-8.63856	0	0	0	0	2	0	2	2	2	0	2	0	2	0	2	2	0	2	0	0	2	2	0	2	0	2	0	2	2	2	2	2	2	0	0	0	0	2	2	2	0	0	0	2	2	2
SA62	-5.0654	4.20382	7.36778	NA	NA	0	0	2	0	0	0	2	0	0	NA	0	NA	0	NA	2	NA	2	2	2	NA	0	2	2	NA	0	NA	2	NA	0	2	0	2	2	NA	0	2	2	2	0	2	NA	2	0	2
SA63	41.7086	-9.3363	-3.78705	0	2	2	0	2	0	2	2	2	0	2	0	0	0	0	2	2	0	0	0	0	0	0	0	0	2	0	2	2	2	2	0	2	2	0	0	2	2	0	0	0	0	2	0	0	2
SA64	3.91144	2.36139	9.30248	0	0	0	0	2	0	NA	2	2	2	0	0	0	0	0	2	0	0	0	2	2	0	0	0	2	2	0	0	2	0	2	2	2	0	0	0	2	0	2	2	2	0	2	0	0	2
SA65	-20.1843	-1.07948	-8.08363	0	0	0	0	2	0	2	2	2	0	2	0	2	0	2	2	0	2	0	0	2	2	0	2	0	2	0	2	2	2	2	2	2	0	0	0	0	2	2	2	0	0	0	2	2	2
SA66	-20.1843	-6.30801	0.101647	2	0	2	2	0	2	0	0	2	2	0	2	0	2	2	2	0	0	2	0	0	2	0	2	2	2	0	0	0	0	0	0	0	0	2	2	2	0	0	2	2	2	0	0	0	0
SA67	-20.1843	-3.5462	3.43125	0	0	0	0	2	0	0	2	2	0	0	0	2	0	2	2	2	2	2	2	0	0	0	0	0	0	0	0	2	0	0	2	0	2	2	0	2	2	2	2	0	2	2	0	0	2
SA68	1.54911	-0.571311	1.83892	NA	2	2	2	0	2	0	0	0	0	0	2	0	2	2	0	2	0	2	2	0	0	2	0	2	2	0	2	2	0	0	0	NA	0	0	2	0	2	0	0	0	2	0	NA	0	0
SA69	-5.53786	4.73253	17.358	0	NA	NA	NA	NA	0	NA	2	NA	NA	0	NA	0	NA	NA	0	NA	2	NA	0	NA	NA	NA	NA	0	0	NA	2	NA	0	2	NA	NA	0	0	2	2	NA	2	0	NA	NA	NA	0	NA	0
SA70	37.4564	-2.57482	-2.53429	NA	2	2	0	2	0	2	2	2	0	2	0	0	0	0	2	2	0	0	0	0	0	0	0	0	2	0	2	2	2	2	0	2	2	0	0	2	2	0	0	0	0	2	0	0	2
SA74	-16.4046	2.08948	-8.4703	0	NA	0	NA	0	NA	NA	2	0	NA	NA	2	NA	NA	0	2	0	0	NA	2	0	2	0	0	2	2	0	2	NA	2	NA	2	NA	NA	0	2	0	0	2	2	2	0	0	0	NA	2
SA75	-17.3495	-3.15681	-3.78289	0	0	0	2	0	2	2	2	0	2	2	2	2	0	0	2	0	0	0	2	0	2	0	0	2	2	0	2	0	2	2	2	2	0	0	2	0	0	2	2	2	0	0	0	2	2
SA76	43.5985	6.29553	-2.50056	2	0	0	0	2	0	0	0	2	0	0	0	0	2	2	0	0	0	2	0	0	2	0	2	0	0	2	2	2	0	0	2	2	2	2	0	2	2	2	0	0	2	0	2	0	0
SA77	-21.1292	0.447855	-7.69286	0	0	0	2	0	2	2	2	2	2	2	2	0	0	0	0	0	0	0	2	2	2	0	0	0	0	0	2	0	0	2	2	2	2	0	2	2	0	2	0	2	0	2	2	0	0
SA78	-4.59293	12.6572	12.0111	2	2	2	2	2	2	2	0	0	2	0	2	0	2	2	2	0	2	0	2	2	2	2	2	0	0	2	2	0	2	2	0	0	2	2	2	0	0	0	2	2	0	0	0	2	2
SA79	-3.648	11.5865	-1.28225	NA	NA	NA	2	2	2	0	NA	2	NA	2	2	NA	NA	NA	0	0	0	NA	2	2	NA	2	0	NA	NA	0	2	2	0	2	0	2	2	0	2	2	NA	NA	0	NA	NA	NA	NA	0	0
SA80	-21.1292	-2.65852	-1.97935	0	0	0	2	0	2	2	2	2	2	2	2	0	0	0	0	0	0	0	2	2	2	0	0	0	0	0	2	0	0	2	2	2	2	0	2	2	0	2	0	2	0	2	2	0	0
SA81	42.1811	6.81698	1.90518	2	0	0	0	2	0	0	0	2	0	0	0	0	2	2	0	0	0	2	0	0	2	0	2	0	0	2	2	2	0	0	2	2	2	2	0	2	2	2	0	0	2	0	2	0	0
SA82	-20.6567	-3.09428	5.92845	0	2	0	0	2	0	2	2	2	2	2	0	2	0	2	2	NA	2	0	2	2	0	0	2	0	0	0	2	0	2	0	2	0	0	NA	0	2	0	2	0	2	0	2	0	0	2
SA83	-22.0741	-2.24462	-7.11249	0	0	0	2	2	2	2	2	2	2	2	2	2	0	2	2	2	2	0	NA	0	2	2	2	2	0	0	2	0	2	0	2	2	2	0	2	2	2	2	2	2	0	0	0	2	2
SA85	29.4245	-6.00176	5.41848	2	2	0	2	0	2	2	0	0	2	2	2	0	2	2	2	2	0	0	2	0	2	0	0	2	2	0	2	0	2	2	2	2	2	2	2	2	0	2	0	2	0	2	NA	0	2
SA86	34.6217	6.97441	1.60922	NA	2	0	2	NA	2	2	NA	NA	2	NA	2	0	NA	2	NA	0	NA	0	2	0	NA	0	0	2	NA	0	NA	0	NA	2	2	0	2	NA	2	2	0	2	0	2	0	NA	0	0	NA
SA88	35.0941	15.3986	9.31708	2	0	0	2	0	2	0	0	0	2	2	2	0	2	2	0	0	2	2	0	2	2	2	2	0	0	0	0	0	0	0	2	2	0	2	2	2	0	2	2	2	2	0	0	2	0
SA89	42.1811	-10.009	-2.08435	NA	2	0	2	2	2	0	0	0	NA	2	2	2	2	0	0	2	2	2	0	2	2	2	0	2	2	0	0	0	0	2	2	2	0	2	2	NA	0	2	2	2	NA	2	2	2	0
SA93	-2.70307	-0.455259	-3.12576	0	0	0	2	0	2	0	2	0	0	0	2	0	0	0	0	0	0	2	2	2	0	2	2	0	0	0	2	2	0	2	2	0	2	2	2	2	0	2	2	0	2	2	2	2	2
SA94	-21.1292	-5.07748	-1.42442	2	0	0	0	0	0	2	0	0	2	0	0	2	2	0	0	0	0	0	0	2	0	0	2	0	0	2	2	0	0	0	2	0	2	2	0	0	0	2	0	2	0	2	2	0	0
SA95	-20.6567	5.92583	-4.06036	0	2	0	2	2	2	2	2	2	2	2	2	2	0	2	2	2	0	0	2	0	2	2	0	2	0	0	2	0	2	2	2	2	0	0	2	0	0	2	2	2	0	2	2	2	2
SA96	-18.2944	-0.263722	-8.77729	0	0	0	0	0	0	2	2	0	0	2	0	0	0	2	2	2	2	0	2	0	2	2	2	0	2	0	0	2	2	0	2	2	2	0	0	2	2	2	0	0	NA	2	NA	0	0
SA97	-8.37265	15.0109	3.98618	2	0	2	0	2	0	0	0	2	0	0	0	0	2	2	0	2	2	2	0	2	2	0	0	0	2	2	0	2	0	0	0	0	0	2	0	0	2	0	0	0	2	0	2	0	0
SA98	-19.2393	2.97775	-4.89276	2	0	2	0	0	0	0	0	2	0	2	0	0	2	2	2	2	2	2	0	2	2	2	2	2	0	0	2	2	2	0	0	2	2	2	0	2	2	0	2	0	2	2	NA	2	0
SA99	56.355	21.6021	9.68257	0	0	0	2	2	2	0	2	0	2	2	2	NA	0	0	0	0	0	2	2	0	2	2	2	0	0	0	2	0	2	2	2	2	0	0	2	0	0	2	0	2	2	2	2	0	0
SA100	-9.79005	3.42345	-0.59202	2	2	2	0	2	0	0	0	2	0	0	0	0	2	0	0	2	0	2	0	2	0	NA	0	2	2	2	2	2	0	2	0	0	2	0	0	2	2	0	0	0	2	NA	0	2	0
SA101	45.0159	1.05406	-0.59202	0	0	0	2	0	2	0	2	2	2	2	2	2	0	0	0	2	0	2	2	2	2	0	2	2	0	2	2	0	0	0	2	0	0	2	2	2	0	2	0	2	2	0	2	2	2
SA102	9.10855	5.20381	3.25349	0	2	0	2	2	2	0	2	0	0	0	2	2	0	2	2	0	0	2	0	2	0	0	0	2	2	2	2	2	0	0	2	0	2	2	2	2	2	2	0	NA	2	0	0	2	0
SA103	-15.9321	-2.11588	-2.67302	0	0	2	0	0	0	0	2	0	0	2	0	0	0	2	2	2	2	2	2	2	0	0	0	0	2	0	2	2	NA	2	0	NA	NA	0	0	2	2	0	2	0	2	2	2	2	2
SA105	30.8419	2.65515	9.36329	0	0	0	2	2	2	2	2	2	0	0	2	2	0	2	2	0	2	0	2	2	0	0	NA	2	0	0	2	2	2	2	2	0	2	0	2	2	2	2	0	0	NA	0	2	0	2
SA106	-17.822	-4.72855	1.76645	2	NA	2	0	2	0	2	0	0	0	2	NA	2	2	0	0	0	2	0	2	2	2	2	2	2	0	0	2	2	0	2	0	NA	2	2	0	2	2	0	0	0	NA	NA	0	2	0
SA107	10.9984	3.48104	8.75437	0	0	0	2	0	2	0	2	2	2	0	2	0	0	2	0	0	2	2	2	0	0	0	0	2	0	0	2	0	0	2	2	0	2	0	2	0	0	2	2	2	2	0	0	0	0
SA108	15.7231	-1.04281	9.00859	0	0	0	2	2	2	2	2	2	0	0	2	2	0	2	2	0	2	0	2	2	0	0	2	2	0	0	2	2	2	2	2	0	2	0	2	2	2	2	0	0	0	0	2	0	2
SA109	-18.2944	-4.74001	-2.53429	2	0	2	0	2	0	2	0	0	0	2	0	2	2	0	0	0	2	0	2	2	2	2	2	2	0	0	2	2	0	2	0	NA	2	2	0	2	2	0	0	0	0	2	0	2	0
SA110	20.4477	0.979806	9.39679	0	0	0	2	2	2	2	2	2	0	0	2	2	0	2	2	0	2	0	2	2	0	0	NA	2	0	0	2	2	2	NA	2	0	2	0	2	2	2	2	0	0	NA	0	2	0	2
SA111	-19.7118	-1.95386	-4.75402	2	0	2	0	2	0	2	0	0	0	2	0	2	2	0	0	0	2	0	2	2	2	2	2	2	0	0	2	2	0	2	0	2	2	2	0	2	2	0	0	0	0	NA	0	2	0
SA112	-20.6567	-2.60074	-6.10905	0	NA	NA	2	0	NA	2	2	2	2	2	2	2	0	2	0	0	NA	0	2	2	2	NA	2	0	2	0	2	NA	0	2	0	NA	NA	2	2	NA	0	2	2	2	NA	NA	NA	NA	0
SA113	-18.2944	-1.96235	-1.14695	2	0	2	0	2	0	2	0	0	0	2	0	2	2	0	0	0	2	0	2	2	0	2	2	2	2	0	2	2	2	2	0	2	2	0	0	0	2	0	2	0	0	2	0	0	0
SA114	-15.9321	1.03164	3.63478	0	0	0	2	0	2	0	2	0	0	0	2	2	0	2	0	0	0	2	0	0	0	2	0	2	0	2	2	0	0	0	2	0	2	2	2	2	2	2	2	2	0	2	0	2	2
SA115	3.43897	-1.26231	13.3815	0	0	0	2	2	2	0	2	2	0	2	2	0	0	0	2	0	0	2	2	2	0	2	2	0	0	0	2	2	2	2	2	NA	2	2	2	0	2	2	2	0	2	0	0	2	2
SA116	-13.0973	-3.17913	1.90518	2	2	2	0	2	2	0	0	2	2	2	0	2	2	2	2	0	0	2	2	2	2	2	0	2	0	2	2	0	0	2	2	0	0	0	0	2	0	0	0	2	NA	0	NA	0	2
SA117	42.6536	5.70813	9.29609	0	2	0	2	0	0	2	2	0	2	0	2	0	0	2	0	0	0	0	0	0	2	2	0	2	2	0	2	0	0	2	2	0	2	2	2	2	2	2	2	2	0	2	2	0	0
SA118	-17.822	-2.92051	1.21151	0	2	2	2	0	2	2	2	2	2	0	2	0	0	2	2	2	2	0	2	0	2	2	2	0	0	0	0	0	2	2	0	0	0	2	2	0	0	0	2	2	0	0	2	0	2
SA119	-14.9872	-2.78975	-0.519354	0	2	2	0	0	0	2	2	2	0	2	0	2	0	2	0	0	2	0	0	2	0	2	NA	0	2	2	0	2	0	0	0	2	0	0	0	0	2	0	0	0	NA	2	0	2	2
SA120	37.4564	4.67772	9.72902	2	2	0	2	0	2	2	0	0	2	0	2	0	2	2	0	0	2	0	0	0	0	2	NA	2	2	2	0	0	NA	0	2	NA	0	0	2	0	0	2	0	2	0	0	0	0	0
SA121	-19.2393	0.0516636	-0.314553	0	0	0	0	0	0	0	2	2	2	0	0	0	0	2	2	0	0	2	0	0	2	2	0	0	0	0	2	0	2	0	2	0	0	0	0	2	0	2	2	2	2	0	2	0	2
SA122	-15.9321	-1.03431	-8.77729	0	2	NA	2	0	NA	2	2	2	0	2	2	0	0	2	2	0	2	0	2	0	2	2	2	0	0	2	2	2	2	0	2	2	NA	0	2	2	2	2	2	0	0	NA	2	0	2
SA123	-10.2625	-3.75454	1.76645	2	0	2	2	2	NA	2	0	2	0	2	2	2	2	2	0	0	NA	0	NA	NA	NA	2	2	2	2	0	2	2	2	2	0	NA	0	0	2	2	2	0	2	0	0	NA	2	2	0
SA124	1.54911	-2.13381	3.98618	2	0	2	0	0	0	0	0	0	2	2	0	0	2	0	0	0	0	2	2	0	0	2	2	0	0	0	0	0	2	0	2	2	2	0	0	2	0	0	2	2	2	2	2	2	0
SA125	40.7637	4.62888	-2.01324	0	2	NA	2	2	2	2	NA	2	2	0	2	NA	0	2	0	0	2	0	2	0	0	0	0	2	0	0	0	NA	0	2	2	NA	NA	0	2	0	0	2	0	2	0	NA	0	0	0
SA126	-14.9872	1.02796	-1.35165	0	2	2	2	0	2	NA	2	2	2	0	2	0	0	2	2	2	2	0	2	0	2	2	2	0	0	0	0	0	2	2	0	0	0	2	2	0	0	0	2	2	0	0	2	0	2
SA127	-10.735	-7.84368	0.795315	2	2	2	2	2	2	0	0	0	2	2	2	2	2	2	0	0	2	2	0	0	0	2	2	0	0	0	0	0	0	2	0	2	0	2	2	2	0	0	0	2	2	2	2	0	0
SA128	-18.7669	-2.15688	6.62212	2	2	2	2	2	2	0	0	0	2	0	2	0	2	2	2	0	2	2	0	2	0	2	2	0	0	2	2	0	2	2	0	2	2	0	2	2	0	0	0	2	2	0	2	2	2
SA129	-10.2625	-3.10519	3.12973	2	2	2	2	2	2	0	0	0	2	0	2	0	2	2	2	0	2	2	0	2	0	2	NA	0	0	2	2	0	2	2	0	2	2	0	2	2	0	0	0	2	2	0	2	2	2
SA131	41.7086	1.26356	4.81858	2	0	0	2	2	0	0	0	0	0	0	2	0	2	2	2	0	0	2	0	2	0	0	2	2	2	2	2	2	2	0	2	NA	2	2	2	2	2	2	0	0	NA	2	0	0	2
SA132	-1.28568	2.08219	4.54112	2	2	2	2	2	2	0	0	0	0	2	2	2	2	2	2	2	0	2	2	2	2	2	2	0	2	0	2	2	2	2	0	2	2	2	2	0	2	0	0	0	NA	0	2	0	2
SA133	59.6623	2.27724	-0.193553	0	0	2	0	0	0	2	2	0	2	0	0	0	0	2	0	0	0	0	2	2	NA	0	2	0	2	0	2	0	2	2	0	0	0	0	0	2	0	0	0	2	0	2	0	0	NA
SA134	37.9289	-10.1673	-9.66475	0	2	0	2	0	2	2	2	2	2	0	2	0	0	2	2	2	2	0	0	2	2	2	0	0	2	0	2	0	2	0	2	0	2	0	2	0	0	2	0	2	0	2	2	0	2
SA135	-22.5466	-8.37098	-8.91603	0	0	2	0	0	0	2	2	2	0	2	0	0	0	2	2	2	2	0	2	NA	2	2	0	0	2	0	2	2	2	2	0	NA	NA	2	0	2	0	0	0	0	0	NA	0	2	2
SA136	-0.813212	3.77417	5.46493	2	2	2	2	2	2	0	0	0	0	2	2	2	2	2	2	2	0	2	2	2	2	2	2	0	2	0	2	2	2	2	0	2	2	2	2	0	2	0	0	0	2	0	2	0	2
SA137	38.4014	-1.24026	2.30426	0	0	0	2	0	2	2	2	0	0	2	2	0	0	2	2	2	2	0	2	2	2	0	2	2	2	0	2	2	2	2	2	0	2	0	2	2	2	2	0	0	0	2	0	0	2
SA138	41.7086	-6.87042	-7.74287	0	2	0	2	0	2	2	2	2	2	0	2	0	0	2	2	2	2	0	0	2	2	2	0	0	2	0	2	0	2	0	2	0	2	0	2	0	0	2	0	2	0	2	2	0	2
SA139	-9.31758	10.6647	4.40238	2	0	2	0	2	0	NA	0	0	2	2	0	0	2	2	2	2	2	0	0	0	2	2	2	2	0	0	2	0	2	0	0	2	0	0	0	2	0	0	0	2	0	0	0	2	2
SA140	36.984	-2.46931	0.240849	2	0	0	2	2	0	0	0	0	0	0	2	0	2	2	2	0	0	2	0	2	0	0	2	2	2	2	2	2	2	0	2	0	2	2	2	2	2	2	0	0	2	2	0	0	2
SA141	-6.48279	21.6451	-0.453287	2	2	2	2	NA	2	0	0	0	0	2	2	NA	2	2	2	2	0	2	2	2	2	2	2	0	2	0	2	2	2	2	0	NA	2	2	2	0	2	0	0	0	2	0	2	0	2
SA143	-16.4046	-2.12644	-4.19909	0	0	2	2	0	2	2	2	0	2	2	2	2	0	0	0	0	2	0	2	2	2	2	2	2	2	0	2	0	0	0	0	2	2	2	2	2	2	0	2	2	0	0	0	2	0
SA145	-13.0973	-9.49816	3.56998	2	0	0	2	0	0	0	0	2	0	2	2	0	2	2	2	0	0	2	0	0	0	0	2	0	0	2	2	2	0	0	2	2	2	0	2	0	2	2	2	0	2	2	2	0	2
SA146	-19.2393	-6.67064	-8.91603	0	0	2	0	0	0	2	2	2	0	2	0	0	0	2	2	2	2	0	2	0	2	2	NA	0	2	0	2	2	2	2	0	2	0	NA	0	2	0	0	0	0	0	2	0	2	2
SA147	-6.48279	-1.08235	-4.93057	2	2	2	0	2	2	0	0	0	2	2	0	2	2	0	0	0	2	2	0	2	0	NA	NA	0	0	2	2	NA	0	0	0	NA	NA	0	0	0	0	0	2	2	0	NA	0	2	0
SA148	-18.7669	-3.78318	4.26365	0	0	0	0	2	0	NA	2	2	2	0	0	2	0	0	2	2	0	0	0	0	2	2	2	0	2	2	2	0	2	0	2	NA	0	2	0	2	0	2	0	2	0	0	NA	0	0
SA150	40.7637	7.96052	3.39026	2	0	0	2	2	0	0	0	0	0	0	2	0	2	2	2	0	0	2	0	2	0	0	2	2	2	2	2	2	2	0	2	0	2	2	2	2	2	2	0	0	2	2	0	0	2
SA151	-21.1292	-0.218631	-7.52869	0	0	0	0	0	2	2	2	0	2	2	0	2	0	0	0	0	2	0	2	2	0	0	2	2	2	2	2	0	2	2	2	2	0	2	0	2	2	2	0	2	0	2	2	0	0
SA152	-19.7118	-7.21159	-2.79996	0	0	0	0	0	2	0	2	2	0	0	0	2	0	2	2	2	0	2	0	2	0	2	0	0	2	2	2	2	2	2	2	0	2	2	0	2	2	2	0	0	2	0	0	0	2
SA153	-18.2944	0.143061	1.62687	2	2	0	2	0	2	0	0	2	2	0	2	2	2	0	2	0	0	2	0	2	0	0	0	2	2	2	2	0	2	0	2	0	2	2	2	2	0	2	2	2	2	2	0	2	2
SA154	-9.79005	-1.19787	0.934048	0	2	0	2	2	2	0	2	2	0	0	2	0	0	0	2	0	2	2	0	0	0	0	2	2	2	2	2	2	0	2	2	0	0	0	2	0	2	2	0	0	0	2	NA	2	2
SA155	-20.6567	1.11945	-1.02949	0	0	0	2	0	2	0	2	0	0	2	2	0	0	0	2	2	0	2	2	0	2	0	2	0	0	0	2	2	2	2	2	0	2	0	2	0	2	2	2	0	2	0	0	0	2
SA157	-14.5147	1.64284	-9.05476	0	0	2	0	2	2	0	2	0	0	2	0	2	0	0	2	2	2	2	2	2	0	2	0	0	0	0	2	2	0	2	0	2	0	0	0	2	2	0	0	0	2	2	0	0	2
SA159	-6.48279	-2.91183	-2.91251	NA	2	NA	2	2	2	NA	2	0	NA	0	2	0	0	2	2	0	NA	0	0	2	2	2	2	0	0	0	2	NA	2	2	2	NA	NA	NA	2	0	2	2	NA	0	0	NA	0	2	0
SA160	16.668	7.04364	-1.60129	2	0	0	0	2	0	0	0	2	2	0	0	2	2	2	0	2	0	2	0	0	2	2	2	0	0	2	2	0	0	2	2	0	2	2	0	2	0	2	0	2	2	2	NA	0	0
SA161	11.9433	-0.0789601	5.05298	2	0	0	0	0	2	2	0	2	2	2	0	0	2	0	2	0	2	0	2	2	2	2	2	2	2	2	2	0	2	0	2	2	0	2	0	2	0	2	0	2	0	0	2	2	2
SA163	-9.79005	-10.9022	-4.76891	0	0	2	2	0	2	0	2	2	2	0	2	2	0	0	0	0	2	2	NA	0	0	0	2	2	0	2	2	0	0	2	0	0	2	0	2	0	0	0	0	2	NA	2	2	2	0
SA164	-22.5466	-3.3226	-1.97935	2	0	0	2	0	2	0	0	2	2	2	2	2	2	2	2	0	2	2	2	0	2	0	2	2	2	0	2	0	0	2	2	2	2	0	2	0	0	2	NA	2	2	0	0	0	2
SA165	6.27376	-5.97116	-3.62736	2	0	0	2	2	0	2	0	2	0	0	2	0	2	2	2	2	0	0	0	0	0	0	NA	2	2	2	2	2	2	0	2	0	2	2	2	0	2	2	0	0	0	0	2	2	2
SA166	-19.7118	-1.35248	-8.36109	0	0	2	0	0	0	2	2	2	0	2	0	0	0	2	2	2	2	0	2	0	2	2	0	0	2	0	2	2	2	2	0	2	0	2	0	2	0	0	0	0	0	2	0	2	2
SA167	-21.1292	4.21173	5.46493	2	2	2	2	2	2	2	0	2	0	0	2	0	2	2	2	2	0	0	0	2	2	0	0	0	0	2	2	2	2	2	0	0	0	2	2	0	2	0	2	0	0	2	2	2	2
SA168	10.5259	-1.67395	-2.98789	2	0	0	2	2	0	2	0	2	0	0	2	0	2	2	2	2	0	0	0	0	0	0	2	2	2	2	2	2	2	0	2	0	2	2	2	0	2	2	0	0	0	0	2	2	2
SA169	-19.7118	6.10491	0.320574	2	0	0	2	2	2	2	0	0	2	0	2	0	2	2	0	2	2	0	2	2	0	2	2	0	2	0	2	0	2	2	2	0	2	2	2	0	2	2	0	2	0	0	2	2	0
SA170	-6.95526	-0.488235	-2.79068	2	2	2	0	0	2	2	0	0	2	0	0	0	2	0	2	0	0	0	2	2	2	2	2	2	2	0	2	0	2	0	0	0	2	0	0	0	0	0	2	2	0	2	0	2	0
SA171	-19.2393	-3.64031	-4.75402	2	0	2	0	0	0	2	0	0	2	0	0	2	2	2	2	2	0	0	2	2	2	0	2	0	2	0	2	0	2	2	0	0	2	0	0	0	0	0	0	2	0	2	0	0	0
SA172	-22.0741	-3.39882	-8.91603	2	0	2	0	0	0	2	0	2	0	2	0	2	2	2	0	2	0	0	2	2	2	2	NA	0	2	0	2	2	0	0	0	2	NA	NA	0	0	2	0	2	0	0	NA	2	2	0
SA173	-19.7118	-0.156737	-8.36109	2	0	2	2	2	2	2	0	2	2	2	2	0	2	0	0	2	2	0	2	0	2	0	2	2	2	2	2	0	2	0	0	0	0	0	2	2	0	0	2	2	0	0	0	2	0
SA174	-10.735	-4.1735	-4.75402	2	2	0	0	2	0	0	0	2	2	2	0	2	2	2	0	0	0	2	0	2	0	0	2	0	2	0	2	0	0	2	2	2	2	2	0	0	0	2	0	2	2	2	2	2	0
SA175	1.07665	-2.6959	-1.94576	2	NA	2	0	0	2	2	0	0	2	0	0	0	2	0	2	0	0	0	2	2	2	2	2	2	2	0	2	0	2	0	0	0	2	0	0	0	0	0	2	2	0	2	0	2	0
SA176	-21.1292	-0.894729	-5.96158	0	2	0	0	2	0	0	2	2	2	2	0	2	0	2	2	2	2	2	2	2	2	2	2	0	0	0	2	0	2	0	2	2	2	NA	0	0	0	2	2	2	2	0	0	2	2
SA177	-21.6017	1.09654	-5.91184	2	0	2	0	2	0	0	0	0	2	2	0	2	2	2	0	0	0	2	2	0	0	0	0	0	2	0	2	0	0	0	0	0	0	2	0	0	2	0	0	2	2	2	0	2	0
SA178	-5.0654	-6.353	5.59809	0	2	0	0	0	0	2	2	2	0	0	0	2	0	2	0	0	0	0	2	0	0	0	0	0	2	0	2	2	2	2	2	2	2	2	0	2	2	2	0	0	0	2	0	0	0
SA117a	-11.2074	-3.46216	1.6417	2	0	NA	2	0	2	0	0	0	0	2	2	0	2	0	0	0	0	2	0	2	NA	2	0	0	2	2	2	2	0	2	2	NA	2	2	2	NA	2	2	NA	0	2	NA	2	NA	0
[truncated: 762 more columns]
